# Supplementary material for: The importance of individuals of different sizes in the population maintenance of a palm species used by the Fulni-ô Indigenous People in northeast Brazil
Source: PeerJ. 2025 Aug 13;13:e19739. doi: 10.7717/peerj.19739 (PMC12357544; doi:10.7717/peerj.19739)
Supplement: Supplemental Information 1 — High measurements, number of infrutescences and survival of Syagrus coronata individuals during the sampling intervals in Águas Belas, Pernambuco, northeast Brazil. Biotic and abiotic characteristics are also indicated (soil variables, air temperature, air humidity, luminosity). [file peerj-13-19739-s001.xls]

## Sheet: data
Site	Treatment	Plot	Plant	size14	size15	size16	size17	infrut14_15	infrut15_16	surv_14_15	surv_15_16	surv16_17	Humidity	Air Temp	Luminosity	pH	Ca	Ig	Al	Na	K	OC	OM	N	H+Al
1	L	2	203604	0.95	1.16	1.19	NA	NA	NA	1	1	0	56	33	478	5.5	2.3	0.7	0.3	0.12	0.57	4.7	9.084	0.67	4
1	L	2	200185	0.98	1	NA	NA	NA	NA	1	0	NA	56	33	478	5.5	2.3	0.7	0.3	0.12	0.57	4.7	9.084	0.67	4
1	L	2	601	NA	NA	NA	1.2	NA	NA	NA	NA	1	56	33	478	5.5	2.3	0.7	0.3	0.12	0.57	4.7	9.084	0.67	4
1	L	1	579	NA	NA	NA	1.8	NA	NA	NA	NA	1	61.4	31.3	348	5.5	2.3	0.7	0.3	0.12	0.57	4.7	9.084	0.67	4
1	L	1	571	1.2	1.9	2.5	2.7	0	0	1	1	1	61.4	31.3	348	5.5	2.3	0.7	0.3	0.12	0.57	4.7	9.084	0.67	4
1	L	1	576	1.7	2.5	3	4	0	0	1	1	1	61.4	31.3	348	5.5	2.3	0.7	0.3	0.12	0.57	4.7	9.084	0.67	4
1	L	1	568	1.75	2.2	2.6	4	0	0	1	1	1	61.4	31.3	348	5.5	2.3	0.7	0.3	0.12	0.57	4.7	9.084	0.67	4
1	L	1	581	1.9	2.5	3	2.6	0	0	1	1	1	61.4	31.3	348	5.5	2.3	0.7	0.3	0.12	0.57	4.7	9.084	0.67	4
1	L	1	569	2	2.3	2.6	2.4	0	0	1	1	1	61.4	31.3	348	5.5	2.3	0.7	0.3	0.12	0.57	4.7	9.084	0.67	4
1	L	1	573	2	2.3	2.7	2.8	0	0	1	1	1	61.4	31.3	348	5.5	2.3	0.7	0.3	0.12	0.57	4.7	9.084	0.67	4
1	L	1	203699	2	2.4	2.75	NA	0	0	1	1	0	61.4	31.3	348	5.5	2.3	0.7	0.3	0.12	0.57	4.7	9.084	0.67	4
1	L	1	577	2.2	2.5	3	3.7	0	0	1	1	1	61.4	31.3	348	5.5	2.3	0.7	0.3	0.12	0.57	4.7	9.084	0.67	4
1	L	1	593	2.2	2.5	2.5	2.3	0	0	1	1	1	61.4	31.3	348	5.5	2.3	0.7	0.3	0.12	0.57	4.7	9.084	0.67	4
1	L	1	200122	2.2	2.8	3.7	NA	0	0	1	1	0	61.4	31.3	348	5.5	2.3	0.7	0.3	0.12	0.57	4.7	9.084	0.67	4
1	L	1	206821	2.2	2.5	NA	NA	0	NA	1	0	NA	61.4	31.3	348	5.5	2.3	0.7	0.3	0.12	0.57	4.7	9.084	0.67	4
1	L	1	567	2.3	2.6	3.1	3.5	0	0	1	1	1	61.4	31.3	348	5.5	2.3	0.7	0.3	0.12	0.57	4.7	9.084	0.67	4
1	L	1	572	2.3	2.7	3.3	3.9	0	0	1	1	1	61.4	31.3	348	5.5	2.3	0.7	0.3	0.12	0.57	4.7	9.084	0.67	4
1	L	1	591	2.5	2.5	3	3.2	0	0	1	1	1	61.4	31.3	348	5.5	2.3	0.7	0.3	0.12	0.57	4.7	9.084	0.67	4
1	L	1	587	2.5	2.8	3	3.3	0	0	1	1	1	61.4	31.3	348	5.5	2.3	0.7	0.3	0.12	0.57	4.7	9.084	0.67	4
1	L	1	590	2.5	2.9	3	3	0	0	1	1	1	61.4	31.3	348	5.5	2.3	0.7	0.3	0.12	0.57	4.7	9.084	0.67	4
1	L	1	588	2.5	3	3.3	3.5	0	0	1	1	1	61.4	31.3	348	5.5	2.3	0.7	0.3	0.12	0.57	4.7	9.084	0.67	4
1	L	1	582	2.5	3	3.5	4	0	0	1	1	1	61.4	31.3	348	5.5	2.3	0.7	0.3	0.12	0.57	4.7	9.084	0.67	4
1	L	1	203665	2.7	3.4	4	NA	0	0	1	1	0	61.4	31.3	348	5.5	2.3	0.7	0.3	0.12	0.57	4.7	9.084	0.67	4
1	L	1	595	2.7	3.5	4	3.8	0	0	1	1	1	61.4	31.3	348	5.5	2.3	0.7	0.3	0.12	0.57	4.7	9.084	0.67	4
1	L	1	585	2.8	3	3.3	3.5	0	0	1	1	1	61.4	31.3	348	5.5	2.3	0.7	0.3	0.12	0.57	4.7	9.084	0.67	4
1	L	1	578	2.8	3.5	4	3.5	0	0	1	1	1	61.4	31.3	348	5.5	2.3	0.7	0.3	0.12	0.57	4.7	9.084	0.67	4
1	L	1	596	3	3.3	4	5	0	0	1	1	1	61.4	31.3	348	5.5	2.3	0.7	0.3	0.12	0.57	4.7	9.084	0.67	4
1	L	1	583	3	3.6	4	4	0	0	1	1	1	61.4	31.3	348	5.5	2.3	0.7	0.3	0.12	0.57	4.7	9.084	0.67	4
1	L	1	580	3	3.6	4.3	4.8	0	0	1	1	1	61.4	31.3	348	5.5	2.3	0.7	0.3	0.12	0.57	4.7	9.084	0.67	4
1	L	1	200123	3.1	3.6	4	NA	0	0	1	1	0	61.4	31.3	348	5.5	2.3	0.7	0.3	0.12	0.57	4.7	9.084	0.67	4
1	L	1	575	3.1	3.8	4.2	4.3	0	0	1	1	1	61.4	31.3	348	5.5	2.3	0.7	0.3	0.12	0.57	4.7	9.084	0.67	4
1	L	1	570	3.2	3.4	3.7	4	1	0	1	1	1	61.4	31.3	348	5.5	2.3	0.7	0.3	0.12	0.57	4.7	9.084	0.67	4
1	L	1	594	3.2	3.5	3.5	4	0	0	1	1	1	61.4	31.3	348	5.5	2.3	0.7	0.3	0.12	0.57	4.7	9.084	0.67	4
1	L	1	592	3.4	3.5	4	3.5	0	0	1	1	1	61.4	31.3	348	5.5	2.3	0.7	0.3	0.12	0.57	4.7	9.084	0.67	4
1	L	1	584	3.4	3.8	4	4.5	0	0	1	1	1	61.4	31.3	348	5.5	2.3	0.7	0.3	0.12	0.57	4.7	9.084	0.67	4
1	L	1	589	3.4	4	4.1	5	0	0	1	1	1	61.4	31.3	348	5.5	2.3	0.7	0.3	0.12	0.57	4.7	9.084	0.67	4
1	L	1	597	3.8	4	4.6	5	0	0	1	1	1	61.4	31.3	348	5.5	2.3	0.7	0.3	0.12	0.57	4.7	9.084	0.67	4
1	L	1	574	3.8	4.5	4.8	4.5	0	0	1	1	1	61.4	31.3	348	5.5	2.3	0.7	0.3	0.12	0.57	4.7	9.084	0.67	4
1	L	1	586	4	4.3	4.5	4.5	0	0	1	1	1	61.4	31.3	348	5.5	2.3	0.7	0.3	0.12	0.57	4.7	9.084	0.67	4
1	L	1	203686	4	4.8	5.5	NA	0	1	1	1	0	61.4	31.3	348	5.5	2.3	0.7	0.3	0.12	0.57	4.7	9.084	0.67	4
1	L	1	200111	4.5	5	5.5	NA	0	0	1	1	0	61.4	31.3	348	5.5	2.3	0.7	0.3	0.12	0.57	4.7	9.084	0.67	4
1	L	1	203663	1.95	2.01	2.24	0.9	NA	NA	1	1	1	61.4	31.3	348	5.5	2.3	0.7	0.3	0.12	0.57	4.7	9.084	0.67	4
1	L	2	607	1.45	2	2.2	2.8	0	0	1	1	1	56	33	478	5.5	2.3	0.7	0.3	0.12	0.57	4.7	9.084	0.67	4
1	L	2	203677	1.5	1.5	2	NA	0	0	1	1	0	56	33	478	5.5	2.3	0.7	0.3	0.12	0.57	4.7	9.084	0.67	4
1	L	2	203627	1.65	2	2	NA	0	0	1	1	0	56	33	478	5.5	2.3	0.7	0.3	0.12	0.57	4.7	9.084	0.67	4
1	L	2	338170	1.8	1.95	2.2	NA	0	0	1	1	0	56	33	478	5.5	2.3	0.7	0.3	0.12	0.57	4.7	9.084	0.67	4
1	L	2	614	2.1	2.5	2.5	2.9	0	0	1	1	1	56	33	478	5.5	2.3	0.7	0.3	0.12	0.57	4.7	9.084	0.67	4
1	L	2	599	2.1	2.6	3.3	4	0	0	1	1	1	56	33	478	5.5	2.3	0.7	0.3	0.12	0.57	4.7	9.084	0.67	4
1	L	2	611	2.5	2.8	3	3	0	0	1	1	1	56	33	478	5.5	2.3	0.7	0.3	0.12	0.57	4.7	9.084	0.67	4
1	L	2	600	2.5	3	3.2	3.7	0	0	1	1	1	56	33	478	5.5	2.3	0.7	0.3	0.12	0.57	4.7	9.084	0.67	4
1	L	2	616	3	3.3	3.5	4.5	0	0	1	1	1	56	33	478	5.5	2.3	0.7	0.3	0.12	0.57	4.7	9.084	0.67	4
1	L	2	617	3	3.5	4	4.5	0	0	1	1	1	56	33	478	5.5	2.3	0.7	0.3	0.12	0.57	4.7	9.084	0.67	4
1	L	2	203626	3	3.3	3.7	NA	0	1	1	1	0	56	33	478	5.5	2.3	0.7	0.3	0.12	0.57	4.7	9.084	0.67	4
1	L	2	602	3	3.5	4	4.5	0	1	1	1	1	56	33	478	5.5	2.3	0.7	0.3	0.12	0.57	4.7	9.084	0.67	4
1	L	2	603	3.2	3.5	3.7	4.3	0	0	1	1	1	56	33	478	5.5	2.3	0.7	0.3	0.12	0.57	4.7	9.084	0.67	4
1	L	2	613	3.3	4	4	5	0	0	1	1	1	56	33	478	5.5	2.3	0.7	0.3	0.12	0.57	4.7	9.084	0.67	4
1	L	2	604	3.3	4	4	4.5	0	2	1	1	1	56	33	478	5.5	2.3	0.7	0.3	0.12	0.57	4.7	9.084	0.67	4
1	L	2	610	3.5	3.7	4.2	4.5	0	0	1	1	1	56	33	478	5.5	2.3	0.7	0.3	0.12	0.57	4.7	9.084	0.67	4
1	L	2	338167	3.5	4	4	NA	0	0	1	1	0	56	33	478	5.5	2.3	0.7	0.3	0.12	0.57	4.7	9.084	0.67	4
1	L	2	598	3.5	3.8	4	4	0	3	1	1	1	56	33	478	5.5	2.3	0.7	0.3	0.12	0.57	4.7	9.084	0.67	4
1	L	2	606	3.8	4.5	4.8	5	0	0	1	1	1	56	33	478	5.5	2.3	0.7	0.3	0.12	0.57	4.7	9.084	0.67	4
1	L	2	609	4	4	4	4.8	0	0	1	1	1	56	33	478	5.5	2.3	0.7	0.3	0.12	0.57	4.7	9.084	0.67	4
1	L	2	605	4	4	4.3	5	0	0	1	1	1	56	33	478	5.5	2.3	0.7	0.3	0.12	0.57	4.7	9.084	0.67	4
1	L	2	618	4	4.3	4.5	4.5	0	1	1	1	1	56	33	478	5.5	2.3	0.7	0.3	0.12	0.57	4.7	9.084	0.67	4
1	L	2	615	4.1	5	5.2	5.3	0	0	1	1	1	56	33	478	5.5	2.3	0.7	0.3	0.12	0.57	4.7	9.084	0.67	4
1	L	2	612	4.3	4.7	5.2	5.5	0	0	1	1	1	56	33	478	5.5	2.3	0.7	0.3	0.12	0.57	4.7	9.084	0.67	4
1	L	2	608	4.4	5	5.3	5.2	1	0	1	1	1	56	33	478	5.5	2.3	0.7	0.3	0.12	0.57	4.7	9.084	0.67	4
2	L	1	474	1.1	1.3	1.5	1.5	0	0	1	1	1	41	37.5	746	6.1	1.1	0.4	0.1	0.39	0.55	8.5	14.62	0.53	2.5
2	L	1	462	1.7	2	2.4	4	0	2	1	1	1	41	37.5	746	6.1	1.1	0.4	0.1	0.39	0.55	8.5	14.62	0.53	2.5
2	L	1	470	2	2.2	2.6	2.5	0	0	1	1	1	41	37.5	746	6.1	1.1	0.4	0.1	0.39	0.55	8.5	14.62	0.53	2.5
2	L	1	463	2	2.3	3	2.5	0	0	1	1	1	41	37.5	746	6.1	1.1	0.4	0.1	0.39	0.55	8.5	14.62	0.53	2.5
2	L	1	472	2	2.5	2.5	3	5	2	1	1	1	41	37.5	746	6.1	1.1	0.4	0.1	0.39	0.55	8.5	14.62	0.53	2.5
2	L	1	461	2.2	2.5	3.1	3	0	0	1	1	1	41	37.5	746	6.1	1.1	0.4	0.1	0.39	0.55	8.5	14.62	0.53	2.5
2	L	1	465	2.5	3	3.3	4	2	0	1	1	1	41	37.5	746	6.1	1.1	0.4	0.1	0.39	0.55	8.5	14.62	0.53	2.5
2	L	1	466	2.5	3	3.8	4	3	0	1	1	1	41	37.5	746	6.1	1.1	0.4	0.1	0.39	0.55	8.5	14.62	0.53	2.5
2	L	1	473	2.5	3	3.5	4	0	1	1	1	1	41	37.5	746	6.1	1.1	0.4	0.1	0.39	0.55	8.5	14.62	0.53	2.5
2	L	1	464	2.5	3	3.3	4.9	3	2	1	1	1	41	37.5	746	6.1	1.1	0.4	0.1	0.39	0.55	8.5	14.62	0.53	2.5
2	L	1	471	2.5	3	3.3	3.5	3	5	1	1	1	41	37.5	746	6.1	1.1	0.4	0.1	0.39	0.55	8.5	14.62	0.53	2.5
2	L	1	468	3	3	3.5	3.8	0	0	1	1	1	41	37.5	746	6.1	1.1	0.4	0.1	0.39	0.55	8.5	14.62	0.53	2.5
2	L	1	467	3	3	3.2	4	5	4	1	1	1	41	37.5	746	6.1	1.1	0.4	0.1	0.39	0.55	8.5	14.62	0.53	2.5
2	L	1	469	3	3.2	3.5	4.1	1	6	1	1	1	41	37.5	746	6.1	1.1	0.4	0.1	0.39	0.55	8.5	14.62	0.53	2.5
2	L	1	475	4	4	4.5	4.5	4	5	1	1	1	41	37.5	746	6.1	1.1	0.4	0.1	0.39	0.55	8.5	14.62	0.53	2.5
2	L	1	476	4.5	5	5	5	1	2	1	1	1	41	37.5	746	6.1	1.1	0.4	0.1	0.39	0.55	8.5	14.62	0.53	2.5
2	L	2	477	2.5	3.1	3.5	3.8	2	2	1	1	1	42.2	38.4	1019	6.1	1.1	0.4	0.1	0.39	0.55	8.5	14.62	0.53	2.5
2	L	2	479	3	3.2	3.5	3.1	4	3	1	1	1	42.2	38.4	1019	6.1	1.1	0.4	0.1	0.39	0.55	8.5	14.62	0.53	2.5
2	L	2	478	3.5	3.5	4	4.5	0	6	1	1	1	42.2	38.4	1019	6.1	1.1	0.4	0.1	0.39	0.55	8.5	14.62	0.53	2.5
3	I	2	203032	0.09	0.12	NA	NA	NA	NA	1	0	NA	44.2	35	858	5.9	1.4	0.7	0.3	0.07	0.41	4.1	7.052	0.35	3.7
3	I	2	206727	0.26	0.79	NA	NA	NA	NA	1	0	NA	44.2	35	858	5.9	1.4	0.7	0.3	0.07	0.41	4.1	7.052	0.35	3.7
3	I	2	203623	0.36	NA	NA	NA	NA	NA	0	NA	NA	44.2	35	858	5.9	1.4	0.7	0.3	0.07	0.41	4.1	7.052	0.35	3.7
3	I	2	206709	0.46	NA	NA	NA	NA	NA	0	NA	NA	44.2	35	858	5.9	1.4	0.7	0.3	0.07	0.41	4.1	7.052	0.35	3.7
3	I	2	206796	0.68	NA	NA	NA	NA	NA	0	NA	NA	44.2	35	858	5.9	1.4	0.7	0.3	0.07	0.41	4.1	7.052	0.35	3.7
3	I	2	206707	0.73	0.79	0.8	NA	NA	NA	1	1	0	44.2	35	858	5.9	1.4	0.7	0.3	0.07	0.41	4.1	7.052	0.35	3.7
3	I	2	206748	NA	0.08	NA	NA	NA	NA	NA	0	NA	44.2	35	858	5.9	1.4	0.7	0.3	0.07	0.41	4.1	7.052	0.35	3.7
3	I	2	206750	NA	0.09	NA	NA	NA	NA	NA	0	NA	44.2	35	858	5.9	1.4	0.7	0.3	0.07	0.41	4.1	7.052	0.35	3.7
3	I	2	206705	NA	0.12	NA	NA	NA	NA	NA	0	NA	44.2	35	858	5.9	1.4	0.7	0.3	0.07	0.41	4.1	7.052	0.35	3.7
3	I	2	206708	NA	0.15	0.62	NA	NA	NA	NA	1	0	44.2	35	858	5.9	1.4	0.7	0.3	0.07	0.41	4.1	7.052	0.35	3.7
3	I	2	203615	NA	0.15	0.82	NA	NA	NA	NA	1	0	44.2	35	858	5.9	1.4	0.7	0.3	0.07	0.41	4.1	7.052	0.35	3.7
3	I	2	200197	NA	0.15	NA	NA	NA	NA	NA	0	NA	44.2	35	858	5.9	1.4	0.7	0.3	0.07	0.41	4.1	7.052	0.35	3.7
3	I	2	206749	NA	0.16	NA	NA	NA	NA	NA	0	NA	44.2	35	858	5.9	1.4	0.7	0.3	0.07	0.41	4.1	7.052	0.35	3.7
3	I	2	206746	NA	0.19	NA	NA	NA	NA	NA	0	NA	44.2	35	858	5.9	1.4	0.7	0.3	0.07	0.41	4.1	7.052	0.35	3.7
3	I	2	203621	NA	0.2	0.57	NA	NA	NA	NA	1	0	44.2	35	858	5.9	1.4	0.7	0.3	0.07	0.41	4.1	7.052	0.35	3.7
3	I	2	206747	NA	0.21	NA	NA	NA	NA	NA	0	NA	44.2	35	858	5.9	1.4	0.7	0.3	0.07	0.41	4.1	7.052	0.35	3.7
3	I	2	206767	NA	0.24	NA	NA	NA	NA	NA	0	NA	44.2	35	858	5.9	1.4	0.7	0.3	0.07	0.41	4.1	7.052	0.35	3.7
3	I	2	200125	NA	0.25	NA	NA	NA	NA	NA	0	NA	44.2	35	858	5.9	1.4	0.7	0.3	0.07	0.41	4.1	7.052	0.35	3.7
3	I	2	206766	NA	0.32	NA	NA	NA	NA	NA	0	NA	44.2	35	858	5.9	1.4	0.7	0.3	0.07	0.41	4.1	7.052	0.35	3.7
3	I	2	203617	NA	0.46	0.64	NA	NA	NA	NA	1	0	44.2	35	858	5.9	1.4	0.7	0.3	0.07	0.41	4.1	7.052	0.35	3.7
3	I	2	206810	NA	0.63	0.67	NA	NA	NA	NA	1	0	44.2	35	858	5.9	1.4	0.7	0.3	0.07	0.41	4.1	7.052	0.35	3.7
3	I	2	203653	NA	0.93	0.95	NA	NA	NA	NA	1	0	44.2	35	858	5.9	1.4	0.7	0.3	0.07	0.41	4.1	7.052	0.35	3.7
3	I	2	338139	NA	NA	0.22	NA	NA	NA	NA	NA	0	44.2	35	858	5.9	1.4	0.7	0.3	0.07	0.41	4.1	7.052	0.35	3.7
3	I	2	338108	NA	NA	0.25	NA	NA	NA	NA	NA	0	44.2	35	858	5.9	1.4	0.7	0.3	0.07	0.41	4.1	7.052	0.35	3.7
3	I	1	1037	4.4	4.5	4.8	6	8	8	1	1	1	44.5	34.4	792	5.9	1.4	0.7	0.3	0.07	0.41	4.1	7.052	0.35	3.7
3	I	1	1038	4.7	5	5.3	5.7	7	6	1	1	1	44.5	34.4	792	5.9	1.4	0.7	0.3	0.07	0.41	4.1	7.052	0.35	3.7
3	I	1	206761	6	6.3	NA	NA	0	NA	1	0	NA	44.5	34.4	792	5.9	1.4	0.7	0.3	0.07	0.41	4.1	7.052	0.35	3.7
3	I	2	1065	1.3	1.5	1.85	4	0	0	1	1	1	44.2	35	858	5.9	1.4	0.7	0.3	0.07	0.41	4.1	7.052	0.35	3.7
3	I	2	1056	2.5	2.5	2.6	4	1	0	1	1	1	44.2	35	858	5.9	1.4	0.7	0.3	0.07	0.41	4.1	7.052	0.35	3.7
3	I	2	1044	3	3.5	4.2	4	0	2	1	1	1	44.2	35	858	5.9	1.4	0.7	0.3	0.07	0.41	4.1	7.052	0.35	3.7
3	I	2	1063	3.1	3.5	3.9	4	2	3	1	1	1	44.2	35	858	5.9	1.4	0.7	0.3	0.07	0.41	4.1	7.052	0.35	3.7
3	I	2	1066	3.1	3.5	4	4.5	4	4	1	1	1	44.2	35	858	5.9	1.4	0.7	0.3	0.07	0.41	4.1	7.052	0.35	3.7
3	I	2	1057	3.2	3.7	4	4	6	5	1	1	1	44.2	35	858	5.9	1.4	0.7	0.3	0.07	0.41	4.1	7.052	0.35	3.7
3	I	2	1040	3.3	3.8	4.3	5.7	0	0	1	1	1	44.2	35	858	5.9	1.4	0.7	0.3	0.07	0.41	4.1	7.052	0.35	3.7
3	I	2	1045	3.4	3.8	4.3	5.2	3	5	1	1	1	44.2	35	858	5.9	1.4	0.7	0.3	0.07	0.41	4.1	7.052	0.35	3.7
3	I	2	1060	3.5	3.7	4	4.5	0	1	1	1	1	44.2	35	858	5.9	1.4	0.7	0.3	0.07	0.41	4.1	7.052	0.35	3.7
3	I	2	1058	3.5	3.8	4	4.3	2	5	1	1	1	44.2	35	858	5.9	1.4	0.7	0.3	0.07	0.41	4.1	7.052	0.35	3.7
3	I	2	1062	3.7	3.7	4	3.5	2	7	1	1	1	44.2	35	858	5.9	1.4	0.7	0.3	0.07	0.41	4.1	7.052	0.35	3.7
3	I	2	1054	3.8	4	4.5	4.3	3	2	1	1	1	44.2	35	858	5.9	1.4	0.7	0.3	0.07	0.41	4.1	7.052	0.35	3.7
3	I	2	1053	3.8	4.2	4.6	6	1	6	1	1	1	44.2	35	858	5.9	1.4	0.7	0.3	0.07	0.41	4.1	7.052	0.35	3.7
3	I	2	1051	3.9	4.2	4.5	5.8	0	4	1	1	1	44.2	35	858	5.9	1.4	0.7	0.3	0.07	0.41	4.1	7.052	0.35	3.7
3	I	2	1055	4	4	4.5	4.7	1	2	1	1	1	44.2	35	858	5.9	1.4	0.7	0.3	0.07	0.41	4.1	7.052	0.35	3.7
3	I	2	1064	4	4.5	5	4.5	2	2	1	1	1	44.2	35	858	5.9	1.4	0.7	0.3	0.07	0.41	4.1	7.052	0.35	3.7
3	I	2	1042	4	4	4.5	4.8	2	3	1	1	1	44.2	35	858	5.9	1.4	0.7	0.3	0.07	0.41	4.1	7.052	0.35	3.7
3	I	2	1041	4	4	4.5	5.5	4	6	1	1	1	44.2	35	858	5.9	1.4	0.7	0.3	0.07	0.41	4.1	7.052	0.35	3.7
3	I	2	1046	4	4.5	4.8	6	1	7	1	1	1	44.2	35	858	5.9	1.4	0.7	0.3	0.07	0.41	4.1	7.052	0.35	3.7
3	I	2	1047	4.2	4.5	5	5.5	6	4	1	1	1	44.2	35	858	5.9	1.4	0.7	0.3	0.07	0.41	4.1	7.052	0.35	3.7
3	I	2	1061	4.8	5.2	5.7	5.8	1	0	1	1	1	44.2	35	858	5.9	1.4	0.7	0.3	0.07	0.41	4.1	7.052	0.35	3.7
3	I	2	1059	5	5	5	4.3	1	5	1	1	1	44.2	35	858	5.9	1.4	0.7	0.3	0.07	0.41	4.1	7.052	0.35	3.7
3	I	2	1039	5	5.5	5.8	5.3	0	5	1	1	1	44.2	35	858	5.9	1.4	0.7	0.3	0.07	0.41	4.1	7.052	0.35	3.7
3	I	2	1050	5.5	5.8	6	6.7	0	5	1	1	1	44.2	35	858	5.9	1.4	0.7	0.3	0.07	0.41	4.1	7.052	0.35	3.7
3	I	2	1048	6	6.5	6.8	7	0	1	1	1	1	44.2	35	858	5.9	1.4	0.7	0.3	0.07	0.41	4.1	7.052	0.35	3.7
3	I	2	1049	6.1	6.5	7	7.5	1	5	1	1	1	44.2	35	858	5.9	1.4	0.7	0.3	0.07	0.41	4.1	7.052	0.35	3.7
3	I	2	1052	7.5	8.5	9	7	5	3	1	1	1	44.2	35	858	5.9	1.4	0.7	0.3	0.07	0.41	4.1	7.052	0.35	3.7
4	I	1	203079	0.16	0.19	NA	NA	NA	NA	1	0	NA	56.3	31.2	289	5.2	5.2	1.5	0.1	0.17	0.25	4.2	7.224	0.32	4
4	I	1	203085	0.17	0.2	0.31	0.3	NA	NA	1	1	1	56.3	31.2	289	5.2	5.2	1.5	0.1	0.17	0.25	4.2	7.224	0.32	4
4	I	1	203101	0.22	0.32	NA	NA	NA	NA	1	0	NA	56.3	31.2	289	5.2	5.2	1.5	0.1	0.17	0.25	4.2	7.224	0.32	4
4	I	1	203091	0.22	0.36	NA	NA	NA	NA	1	0	NA	56.3	31.2	289	5.2	5.2	1.5	0.1	0.17	0.25	4.2	7.224	0.32	4
4	I	1	203086	0.23	0.62	NA	NA	NA	NA	1	0	NA	56.3	31.2	289	5.2	5.2	1.5	0.1	0.17	0.25	4.2	7.224	0.32	4
4	I	1	203090	0.25	0.26	NA	NA	NA	NA	1	0	NA	56.3	31.2	289	5.2	5.2	1.5	0.1	0.17	0.25	4.2	7.224	0.32	4
4	I	1	203093	0.27	0.75	1.14	NA	NA	NA	1	1	0	56.3	31.2	289	5.2	5.2	1.5	0.1	0.17	0.25	4.2	7.224	0.32	4
4	I	1	203080	0.28	0.39	NA	NA	NA	NA	1	0	NA	56.3	31.2	289	5.2	5.2	1.5	0.1	0.17	0.25	4.2	7.224	0.32	4
4	I	1	203084	0.3	0.33	0.35	NA	NA	NA	1	1	0	56.3	31.2	289	5.2	5.2	1.5	0.1	0.17	0.25	4.2	7.224	0.32	4
4	I	1	203094	0.3	NA	NA	NA	NA	NA	0	NA	NA	56.3	31.2	289	5.2	5.2	1.5	0.1	0.17	0.25	4.2	7.224	0.32	4
4	I	1	203077	0.36	0.58	0.63	NA	NA	NA	1	1	0	56.3	31.2	289	5.2	5.2	1.5	0.1	0.17	0.25	4.2	7.224	0.32	4
4	I	1	203087	0.37	0.51	NA	NA	NA	NA	1	0	NA	56.3	31.2	289	5.2	5.2	1.5	0.1	0.17	0.25	4.2	7.224	0.32	4
4	I	1	203081	0.38	0.4	NA	NA	NA	NA	1	0	NA	56.3	31.2	289	5.2	5.2	1.5	0.1	0.17	0.25	4.2	7.224	0.32	4
4	I	1	203088	0.39	0.42	NA	NA	NA	NA	1	0	NA	56.3	31.2	289	5.2	5.2	1.5	0.1	0.17	0.25	4.2	7.224	0.32	4
4	I	1	203089	0.4	0.43	NA	NA	NA	NA	1	0	NA	56.3	31.2	289	5.2	5.2	1.5	0.1	0.17	0.25	4.2	7.224	0.32	4
4	I	1	203100	0.5	0.52	0.55	0.67	NA	NA	1	1	1	56.3	31.2	289	5.2	5.2	1.5	0.1	0.17	0.25	4.2	7.224	0.32	4
4	I	1	203092	0.77	0.8	0.81	0.9	NA	NA	1	1	1	56.3	31.2	289	5.2	5.2	1.5	0.1	0.17	0.25	4.2	7.224	0.32	4
4	I	1	709	0.8	1.2	1.6	2	0	0	1	1	1	56.3	31.2	289	5.2	5.2	1.5	0.1	0.17	0.25	4.2	7.224	0.32	4
4	I	2	369048	0.08	0.19	NA	NA	NA	NA	1	0	NA	55.2	33	247	5.2	5.2	1.5	0.1	0.17	0.25	4.2	7.224	0.32	4
4	I	2	203005	0.08	0.25	NA	NA	NA	NA	1	0	NA	55.2	33	247	5.2	5.2	1.5	0.1	0.17	0.25	4.2	7.224	0.32	4
4	I	2	369067	0.09	0.15	0.24	0.24	NA	NA	1	1	1	55.2	33	247	5.2	5.2	1.5	0.1	0.17	0.25	4.2	7.224	0.32	4
4	I	2	203058	0.1	0.15	0.2	NA	NA	NA	1	1	0	55.2	33	247	5.2	5.2	1.5	0.1	0.17	0.25	4.2	7.224	0.32	4
4	I	2	369058	0.11	0.11	0.12	NA	NA	NA	1	1	0	55.2	33	247	5.2	5.2	1.5	0.1	0.17	0.25	4.2	7.224	0.32	4
4	I	2	203053	0.13	0.26	0.38	NA	NA	NA	1	1	0	55.2	33	247	5.2	5.2	1.5	0.1	0.17	0.25	4.2	7.224	0.32	4
4	I	2	203075	0.13	NA	NA	NA	NA	NA	0	NA	NA	55.2	33	247	5.2	5.2	1.5	0.1	0.17	0.25	4.2	7.224	0.32	4
4	I	2	369020	0.14	0.08	NA	NA	NA	NA	1	0	NA	55.2	33	247	5.2	5.2	1.5	0.1	0.17	0.25	4.2	7.224	0.32	4
4	I	2	203027	0.14	0.2	NA	NA	NA	NA	1	0	NA	55.2	33	247	5.2	5.2	1.5	0.1	0.17	0.25	4.2	7.224	0.32	4
4	I	2	203070	0.14	NA	NA	NA	NA	NA	0	NA	NA	55.2	33	247	5.2	5.2	1.5	0.1	0.17	0.25	4.2	7.224	0.32	4
4	I	2	206868	0.15	0.16	0.18	NA	NA	NA	1	1	0	55.2	33	247	5.2	5.2	1.5	0.1	0.17	0.25	4.2	7.224	0.32	4
4	I	2	203028	0.17	0.35	NA	NA	NA	NA	1	0	NA	55.2	33	247	5.2	5.2	1.5	0.1	0.17	0.25	4.2	7.224	0.32	4
4	I	2	203052	0.2	NA	NA	NA	NA	NA	0	NA	NA	55.2	33	247	5.2	5.2	1.5	0.1	0.17	0.25	4.2	7.224	0.32	4
4	I	2	203074	0.21	NA	NA	NA	NA	NA	0	NA	NA	55.2	33	247	5.2	5.2	1.5	0.1	0.17	0.25	4.2	7.224	0.32	4
4	I	2	203025	0.22	0.21	NA	NA	NA	NA	1	0	NA	55.2	33	247	5.2	5.2	1.5	0.1	0.17	0.25	4.2	7.224	0.32	4
4	I	2	203043	0.22	0.39	0.39	NA	NA	NA	1	1	0	55.2	33	247	5.2	5.2	1.5	0.1	0.17	0.25	4.2	7.224	0.32	4
4	I	2	369024	0.24	0.18	NA	NA	NA	NA	1	0	NA	55.2	33	247	5.2	5.2	1.5	0.1	0.17	0.25	4.2	7.224	0.32	4
4	I	2	206802	0.24	0.24	NA	NA	NA	NA	1	0	NA	55.2	33	247	5.2	5.2	1.5	0.1	0.17	0.25	4.2	7.224	0.32	4
4	I	2	203050	0.24	0.25	0.48	NA	NA	NA	1	1	0	55.2	33	247	5.2	5.2	1.5	0.1	0.17	0.25	4.2	7.224	0.32	4
4	I	2	369069	0.25	0.2	NA	NA	NA	NA	1	0	NA	55.2	33	247	5.2	5.2	1.5	0.1	0.17	0.25	4.2	7.224	0.32	4
4	I	2	369001	0.26	0.28	0.32	NA	NA	NA	1	1	0	55.2	33	247	5.2	5.2	1.5	0.1	0.17	0.25	4.2	7.224	0.32	4
4	I	2	203014	0.26	0.3	0.31	0.3	NA	NA	1	1	1	55.2	33	247	5.2	5.2	1.5	0.1	0.17	0.25	4.2	7.224	0.32	4
4	I	2	203055	0.27	0.27	NA	NA	NA	NA	1	0	NA	55.2	33	247	5.2	5.2	1.5	0.1	0.17	0.25	4.2	7.224	0.32	4
4	I	2	369070	0.27	0.32	0.4	NA	NA	NA	1	1	0	55.2	33	247	5.2	5.2	1.5	0.1	0.17	0.25	4.2	7.224	0.32	4
4	I	2	203012	0.28	NA	NA	NA	NA	NA	0	NA	NA	55.2	33	247	5.2	5.2	1.5	0.1	0.17	0.25	4.2	7.224	0.32	4
4	I	2	206836	0.3	0.28	NA	NA	NA	NA	1	0	NA	55.2	33	247	5.2	5.2	1.5	0.1	0.17	0.25	4.2	7.224	0.32	4
4	I	2	203041	0.3	0.46	0.61	NA	NA	NA	1	1	0	55.2	33	247	5.2	5.2	1.5	0.1	0.17	0.25	4.2	7.224	0.32	4
4	I	2	203009	0.3	NA	NA	NA	NA	NA	0	NA	NA	55.2	33	247	5.2	5.2	1.5	0.1	0.17	0.25	4.2	7.224	0.32	4
4	I	2	369059	0.3	NA	NA	NA	NA	NA	0	NA	NA	55.2	33	247	5.2	5.2	1.5	0.1	0.17	0.25	4.2	7.224	0.32	4
4	I	2	203004	0.31	0.34	0.37	NA	NA	NA	1	1	0	55.2	33	247	5.2	5.2	1.5	0.1	0.17	0.25	4.2	7.224	0.32	4
4	I	2	369064	0.31	0.35	NA	NA	NA	NA	1	0	NA	55.2	33	247	5.2	5.2	1.5	0.1	0.17	0.25	4.2	7.224	0.32	4
4	I	2	369035	0.31	0.36	NA	NA	NA	NA	1	0	NA	55.2	33	247	5.2	5.2	1.5	0.1	0.17	0.25	4.2	7.224	0.32	4
4	I	2	361083	0.32	NA	NA	NA	NA	NA	0	NA	NA	55.2	33	247	5.2	5.2	1.5	0.1	0.17	0.25	4.2	7.224	0.32	4
4	I	2	369966	0.34	0.09	NA	NA	NA	NA	1	0	NA	55.2	33	247	5.2	5.2	1.5	0.1	0.17	0.25	4.2	7.224	0.32	4
4	I	2	203011	0.34	NA	NA	NA	NA	NA	0	NA	NA	55.2	33	247	5.2	5.2	1.5	0.1	0.17	0.25	4.2	7.224	0.32	4
4	I	2	206857	0.36	0.24	NA	NA	NA	NA	1	0	NA	55.2	33	247	5.2	5.2	1.5	0.1	0.17	0.25	4.2	7.224	0.32	4
4	I	2	203071	0.36	NA	NA	NA	NA	NA	0	NA	NA	55.2	33	247	5.2	5.2	1.5	0.1	0.17	0.25	4.2	7.224	0.32	4
4	I	2	369037	0.4	0.24	NA	NA	NA	NA	1	0	NA	55.2	33	247	5.2	5.2	1.5	0.1	0.17	0.25	4.2	7.224	0.32	4
4	I	2	203044	0.4	0.4	0.41	NA	NA	NA	1	1	0	55.2	33	247	5.2	5.2	1.5	0.1	0.17	0.25	4.2	7.224	0.32	4
4	I	2	369065	0.4	0.46	NA	NA	NA	NA	1	0	NA	55.2	33	247	5.2	5.2	1.5	0.1	0.17	0.25	4.2	7.224	0.32	4
4	I	2	203056	0.4	0.5	0.5	NA	NA	NA	1	1	0	55.2	33	247	5.2	5.2	1.5	0.1	0.17	0.25	4.2	7.224	0.32	4
4	I	2	203007	0.4	NA	NA	NA	NA	NA	0	NA	NA	55.2	33	247	5.2	5.2	1.5	0.1	0.17	0.25	4.2	7.224	0.32	4
4	I	2	206835	0.41	0.36	NA	NA	NA	NA	1	0	NA	55.2	33	247	5.2	5.2	1.5	0.1	0.17	0.25	4.2	7.224	0.32	4
4	I	2	206801	0.41	0.44	0.49	NA	NA	NA	1	1	0	55.2	33	247	5.2	5.2	1.5	0.1	0.17	0.25	4.2	7.224	0.32	4
4	I	2	203076	0.42	0.34	NA	NA	NA	NA	1	0	NA	55.2	33	247	5.2	5.2	1.5	0.1	0.17	0.25	4.2	7.224	0.32	4
4	I	2	369036	0.42	0.42	0.5	NA	NA	NA	1	1	0	55.2	33	247	5.2	5.2	1.5	0.1	0.17	0.25	4.2	7.224	0.32	4
4	I	2	203010a	0.42	NA	NA	NA	NA	NA	0	NA	NA	55.2	33	247	5.2	5.2	1.5	0.1	0.17	0.25	4.2	7.224	0.32	4
4	I	2	203059	0.43	NA	NA	0.75	NA	NA	0	NA	1	55.2	33	247	5.2	5.2	1.5	0.1	0.17	0.25	4.2	7.224	0.32	4
4	I	2	203039	0.45	0.4	0.44	0.44	NA	NA	1	1	1	55.2	33	247	5.2	5.2	1.5	0.1	0.17	0.25	4.2	7.224	0.32	4
4	I	2	203036	0.45	NA	NA	NA	NA	NA	0	NA	NA	55.2	33	247	5.2	5.2	1.5	0.1	0.17	0.25	4.2	7.224	0.32	4
4	I	2	369090	0.45	NA	NA	NA	NA	NA	0	NA	NA	55.2	33	247	5.2	5.2	1.5	0.1	0.17	0.25	4.2	7.224	0.32	4
4	I	2	369022	0.46	0.47	0.9	NA	NA	NA	1	1	0	55.2	33	247	5.2	5.2	1.5	0.1	0.17	0.25	4.2	7.224	0.32	4
4	I	2	203051	0.46	NA	NA	NA	NA	NA	0	NA	NA	55.2	33	247	5.2	5.2	1.5	0.1	0.17	0.25	4.2	7.224	0.32	4
4	I	2	203029	0.47	0.17	0.8	NA	NA	NA	1	1	0	55.2	33	247	5.2	5.2	1.5	0.1	0.17	0.25	4.2	7.224	0.32	4
4	I	2	203054	0.47	NA	NA	NA	NA	NA	0	NA	NA	55.2	33	247	5.2	5.2	1.5	0.1	0.17	0.25	4.2	7.224	0.32	4
4	I	2	206856	0.49	NA	NA	NA	NA	NA	0	NA	NA	55.2	33	247	5.2	5.2	1.5	0.1	0.17	0.25	4.2	7.224	0.32	4
4	I	2	206816	0.5	0.47	0.37	0.19	NA	NA	1	1	1	55.2	33	247	5.2	5.2	1.5	0.1	0.17	0.25	4.2	7.224	0.32	4
4	I	2	203073	0.5	NA	NA	NA	NA	NA	0	NA	NA	55.2	33	247	5.2	5.2	1.5	0.1	0.17	0.25	4.2	7.224	0.32	4
4	I	2	203069	0.52	NA	NA	NA	NA	NA	0	NA	NA	55.2	33	247	5.2	5.2	1.5	0.1	0.17	0.25	4.2	7.224	0.32	4
4	I	2	206896	0.54	NA	NA	NA	NA	NA	0	NA	NA	55.2	33	247	5.2	5.2	1.5	0.1	0.17	0.25	4.2	7.224	0.32	4
4	I	2	203042	0.56	0.74	0.75	0.75	NA	NA	1	1	1	55.2	33	247	5.2	5.2	1.5	0.1	0.17	0.25	4.2	7.224	0.32	4
4	I	2	203072	0.63	0.74	0.98	0.17	NA	NA	1	1	1	55.2	33	247	5.2	5.2	1.5	0.1	0.17	0.25	4.2	7.224	0.32	4
4	I	2	206833	0.83	NA	NA	NA	NA	NA	0	NA	NA	55.2	33	247	5.2	5.2	1.5	0.1	0.17	0.25	4.2	7.224	0.32	4
4	I	2	682	0.87	1	1.3	1.7	0	0	1	1	1	55.2	33	247	5.2	5.2	1.5	0.1	0.17	0.25	4.2	7.224	0.32	4
4	I	2	369025	0.98	0.6	NA	NA	NA	NA	1	0	NA	55.2	33	247	5.2	5.2	1.5	0.1	0.17	0.25	4.2	7.224	0.32	4
4	I	1	206771	NA	0.15	NA	NA	NA	NA	NA	0	NA	56.3	31.2	289	5.2	5.2	1.5	0.1	0.17	0.25	4.2	7.224	0.32	4
4	I	1	206730	NA	0.2	NA	NA	NA	NA	NA	0	NA	56.3	31.2	289	5.2	5.2	1.5	0.1	0.17	0.25	4.2	7.224	0.32	4
4	I	1	203649	NA	0.24	NA	NA	NA	NA	NA	0	NA	56.3	31.2	289	5.2	5.2	1.5	0.1	0.17	0.25	4.2	7.224	0.32	4
4	I	1	206854	NA	0.31	NA	NA	NA	NA	NA	0	NA	56.3	31.2	289	5.2	5.2	1.5	0.1	0.17	0.25	4.2	7.224	0.32	4
4	I	1	200169	NA	0.41	NA	NA	NA	NA	NA	0	NA	56.3	31.2	289	5.2	5.2	1.5	0.1	0.17	0.25	4.2	7.224	0.32	4
4	I	1	206729	NA	0.42	NA	NA	NA	NA	NA	0	NA	56.3	31.2	289	5.2	5.2	1.5	0.1	0.17	0.25	4.2	7.224	0.32	4
4	I	1	203650	NA	0.58	NA	NA	NA	NA	NA	0	NA	56.3	31.2	289	5.2	5.2	1.5	0.1	0.17	0.25	4.2	7.224	0.32	4
4	I	1	338195	NA	NA	0.05	NA	NA	NA	NA	NA	0	56.3	31.2	289	5.2	5.2	1.5	0.1	0.17	0.25	4.2	7.224	0.32	4
4	I	2	206735	NA	0.13	NA	NA	NA	NA	NA	0	NA	55.2	33	247	5.2	5.2	1.5	0.1	0.17	0.25	4.2	7.224	0.32	4
4	I	2	206732	NA	0.16	0.32	NA	NA	NA	NA	1	0	55.2	33	247	5.2	5.2	1.5	0.1	0.17	0.25	4.2	7.224	0.32	4
4	I	2	206734	NA	0.16	0.41	NA	NA	NA	NA	1	0	55.2	33	247	5.2	5.2	1.5	0.1	0.17	0.25	4.2	7.224	0.32	4
4	I	2	206731	NA	0.21	NA	NA	NA	NA	NA	0	NA	55.2	33	247	5.2	5.2	1.5	0.1	0.17	0.25	4.2	7.224	0.32	4
4	I	2	206733	NA	0.24	0.44	NA	NA	NA	NA	1	0	55.2	33	247	5.2	5.2	1.5	0.1	0.17	0.25	4.2	7.224	0.32	4
4	I	2	206765	NA	0.28	NA	NA	NA	NA	NA	0	NA	55.2	33	247	5.2	5.2	1.5	0.1	0.17	0.25	4.2	7.224	0.32	4
4	I	2	203655	NA	0.34	0.46	NA	NA	NA	NA	1	0	55.2	33	247	5.2	5.2	1.5	0.1	0.17	0.25	4.2	7.224	0.32	4
4	I	2	203033	NA	1.11	1	NA	NA	NA	NA	1	0	55.2	33	247	5.2	5.2	1.5	0.1	0.17	0.25	4.2	7.224	0.32	4
4	I	2	203010	NA	NA	0.1	NA	NA	NA	NA	NA	0	55.2	33	247	5.2	5.2	1.5	0.1	0.17	0.25	4.2	7.224	0.32	4
4	I	2	338122	NA	NA	0.16	NA	NA	NA	NA	NA	0	55.2	33	247	5.2	5.2	1.5	0.1	0.17	0.25	4.2	7.224	0.32	4
4	I	2	338124	NA	NA	0.16	NA	NA	NA	NA	NA	0	55.2	33	247	5.2	5.2	1.5	0.1	0.17	0.25	4.2	7.224	0.32	4
4	I	2	203059	NA	NA	0.22	NA	NA	NA	NA	NA	0	55.2	33	247	5.2	5.2	1.5	0.1	0.17	0.25	4.2	7.224	0.32	4
4	I	2	338112	NA	NA	0.25	NA	NA	NA	NA	NA	0	55.2	33	247	5.2	5.2	1.5	0.1	0.17	0.25	4.2	7.224	0.32	4
4	I	2	338123	NA	NA	0.28	NA	NA	NA	NA	NA	0	55.2	33	247	5.2	5.2	1.5	0.1	0.17	0.25	4.2	7.224	0.32	4
4	I	2	338125	NA	NA	0.4	0.17	NA	NA	NA	NA	1	55.2	33	247	5.2	5.2	1.5	0.1	0.17	0.25	4.2	7.224	0.32	4
4	I	2	338121	NA	NA	0.9	NA	NA	NA	NA	NA	0	55.2	33	247	5.2	5.2	1.5	0.1	0.17	0.25	4.2	7.224	0.32	4
4	I	1	206759	NA	1.74	NA	NA	NA	NA	NA	0	NA	56.3	31.2	289	5.2	5.2	1.5	0.1	0.17	0.25	4.2	7.224	0.32	4
4	I	1	1029	1	1.3	1.8	3	0	0	1	1	1	56.3	31.2	289	5.2	5.2	1.5	0.1	0.17	0.25	4.2	7.224	0.32	4
4	I	1	338178	1.1	1.4	2.1	NA	0	0	1	1	0	56.3	31.2	289	5.2	5.2	1.5	0.1	0.17	0.25	4.2	7.224	0.32	4
4	I	1	338179	1.14	2	2.1	7	0	0	1	1	1	56.3	31.2	289	5.2	5.2	1.5	0.1	0.17	0.25	4.2	7.224	0.32	4
4	I	1	1024	1.25	1.5	1.5	2	0	0	1	1	1	56.3	31.2	289	5.2	5.2	1.5	0.1	0.17	0.25	4.2	7.224	0.32	4
4	I	1	203017	1.3	1.7	NA	NA	0	NA	1	0	NA	56.3	31.2	289	5.2	5.2	1.5	0.1	0.17	0.25	4.2	7.224	0.32	4
4	I	1	1021	1.5	1.68	1.75	2.5	0	0	1	1	1	56.3	31.2	289	5.2	5.2	1.5	0.1	0.17	0.25	4.2	7.224	0.32	4
4	I	1	203099	1.5	1.75	1.9	1.2	0	0	1	1	1	56.3	31.2	289	5.2	5.2	1.5	0.1	0.17	0.25	4.2	7.224	0.32	4
4	I	1	1020	1.5	2	2	2	0	0	1	1	1	56.3	31.2	289	5.2	5.2	1.5	0.1	0.17	0.25	4.2	7.224	0.32	4
4	I	1	338193	1.5	2	2	1.5	0	0	1	1	1	56.3	31.2	289	5.2	5.2	1.5	0.1	0.17	0.25	4.2	7.224	0.32	4
4	I	1	338192	1.5	2	2.3	2	0	0	1	1	1	56.3	31.2	289	5.2	5.2	1.5	0.1	0.17	0.25	4.2	7.224	0.32	4
4	I	1	1017	1.5	2.2	2.5	2.7	0	0	1	1	1	56.3	31.2	289	5.2	5.2	1.5	0.1	0.17	0.25	4.2	7.224	0.32	4
4	I	1	1035	1.7	1.75	2	2.3	0	0	1	1	1	56.3	31.2	289	5.2	5.2	1.5	0.1	0.17	0.25	4.2	7.224	0.32	4
4	I	1	338182	1.7	1.8	2.3	6.3	0	0	1	1	1	56.3	31.2	289	5.2	5.2	1.5	0.1	0.17	0.25	4.2	7.224	0.32	4
4	I	1	206790	1.9	2	2	2.3	0	0	1	1	1	56.3	31.2	289	5.2	5.2	1.5	0.1	0.17	0.25	4.2	7.224	0.32	4
4	I	1	1030	2	2.2	3	3	0	0	1	1	1	56.3	31.2	289	5.2	5.2	1.5	0.1	0.17	0.25	4.2	7.224	0.32	4
4	I	1	1031	2	2.5	3	1	0	0	1	1	1	56.3	31.2	289	5.2	5.2	1.5	0.1	0.17	0.25	4.2	7.224	0.32	4
4	I	1	338181	2	2.5	3	3.3	0	0	1	1	1	56.3	31.2	289	5.2	5.2	1.5	0.1	0.17	0.25	4.2	7.224	0.32	4
4	I	1	1028	2	2.5	2.5	3.5	0	0	1	1	1	56.3	31.2	289	5.2	5.2	1.5	0.1	0.17	0.25	4.2	7.224	0.32	4
4	I	1	203096	2.2	2.6	3.1	1.4	0	0	1	1	1	56.3	31.2	289	5.2	5.2	1.5	0.1	0.17	0.25	4.2	7.224	0.32	4
4	I	1	369097	2.3	2.5	3	3.3	0	0	1	1	1	56.3	31.2	289	5.2	5.2	1.5	0.1	0.17	0.25	4.2	7.224	0.32	4
4	I	1	1022	2.5	3	4	6	0	0	1	1	1	56.3	31.2	289	5.2	5.2	1.5	0.1	0.17	0.25	4.2	7.224	0.32	4
4	I	1	1018	2.5	3	3.1	3	0	0	1	1	1	56.3	31.2	289	5.2	5.2	1.5	0.1	0.17	0.25	4.2	7.224	0.32	4
4	I	1	203024	2.5	3	3.8	3.2	0	0	1	1	1	56.3	31.2	289	5.2	5.2	1.5	0.1	0.17	0.25	4.2	7.224	0.32	4
4	I	1	1032	2.5	3.1	3.5	3	0	0	1	1	1	56.3	31.2	289	5.2	5.2	1.5	0.1	0.17	0.25	4.2	7.224	0.32	4
4	I	1	203035	2.5	3.1	3.5	3.2	0	0	1	1	1	56.3	31.2	289	5.2	5.2	1.5	0.1	0.17	0.25	4.2	7.224	0.32	4
4	I	1	369072	2.8	3	3.1	NA	0	0	1	1	0	56.3	31.2	289	5.2	5.2	1.5	0.1	0.17	0.25	4.2	7.224	0.32	4
4	I	1	1036	3	3	3.3	NA	0	0	1	1	0	56.3	31.2	289	5.2	5.2	1.5	0.1	0.17	0.25	4.2	7.224	0.32	4
4	I	1	1019	3	3	3.5	0.8	0	0	1	1	1	56.3	31.2	289	5.2	5.2	1.5	0.1	0.17	0.25	4.2	7.224	0.32	4
4	I	1	369073	3	3	3.6	3.5	0	0	1	1	1	56.3	31.2	289	5.2	5.2	1.5	0.1	0.17	0.25	4.2	7.224	0.32	4
4	I	1	203047	3	3.3	3.5	3	0	0	1	1	1	56.3	31.2	289	5.2	5.2	1.5	0.1	0.17	0.25	4.2	7.224	0.32	4
4	I	1	369068	3	3.8	4	0.7	0	0	1	1	1	56.3	31.2	289	5.2	5.2	1.5	0.1	0.17	0.25	4.2	7.224	0.32	4
4	I	1	1033	3.5	3.7	4	4	0	0	1	1	1	56.3	31.2	289	5.2	5.2	1.5	0.1	0.17	0.25	4.2	7.224	0.32	4
4	I	1	369076	4	4.1	4.3	3	0	0	1	1	1	56.3	31.2	289	5.2	5.2	1.5	0.1	0.17	0.25	4.2	7.224	0.32	4
4	I	1	203013	4	4.2	4.8	6.2	2	0	1	1	1	56.3	31.2	289	5.2	5.2	1.5	0.1	0.17	0.25	4.2	7.224	0.32	4
4	I	1	203019	4	4.3	4.5	NA	0	0	1	1	0	56.3	31.2	289	5.2	5.2	1.5	0.1	0.17	0.25	4.2	7.224	0.32	4
4	I	1	338190	4	4.5	4.5	2.3	0	0	1	1	1	56.3	31.2	289	5.2	5.2	1.5	0.1	0.17	0.25	4.2	7.224	0.32	4
4	I	1	369054	4	4.3	4.7	6.7	1	1	1	1	1	56.3	31.2	289	5.2	5.2	1.5	0.1	0.17	0.25	4.2	7.224	0.32	4
4	I	1	1026	5	5.3	5.5	NA	0	0	1	1	0	56.3	31.2	289	5.2	5.2	1.5	0.1	0.17	0.25	4.2	7.224	0.32	4
4	I	1	1034	5	5.3	5.8	6.3	0	0	1	1	1	56.3	31.2	289	5.2	5.2	1.5	0.1	0.17	0.25	4.2	7.224	0.32	4
4	I	1	369050	5	5.6	6	NA	0	0	1	1	0	56.3	31.2	289	5.2	5.2	1.5	0.1	0.17	0.25	4.2	7.224	0.32	4
4	I	1	203045	6	6.5	7	NA	0	0	1	1	0	56.3	31.2	289	5.2	5.2	1.5	0.1	0.17	0.25	4.2	7.224	0.32	4
4	I	1	1023	6.5	7	7.5	3	0	0	1	1	1	56.3	31.2	289	5.2	5.2	1.5	0.1	0.17	0.25	4.2	7.224	0.32	4
4	I	1	206723	7	7	7.2	6.5	0	0	1	1	1	56.3	31.2	289	5.2	5.2	1.5	0.1	0.17	0.25	4.2	7.224	0.32	4
4	I	1	203082	1.15	1.26	1.43	NA	NA	NA	1	1	0	56.3	31.2	289	5.2	5.2	1.5	0.1	0.17	0.25	4.2	7.224	0.32	4
4	I	1	203078	1.55	1.4	1.54	0.4	NA	NA	1	1	1	56.3	31.2	289	5.2	5.2	1.5	0.1	0.17	0.25	4.2	7.224	0.32	4
4	I	2	686	1	1	1.4	1.85	0	0	1	1	1	55.2	33	247	5.2	5.2	1.5	0.1	0.17	0.25	4.2	7.224	0.32	4
4	I	2	709	1	1.2	1.5	1.75	0	0	1	1	1	55.2	33	247	5.2	5.2	1.5	0.1	0.17	0.25	4.2	7.224	0.32	4
4	I	2	708	1	1.35	1.55	6	0	0	1	1	1	55.2	33	247	5.2	5.2	1.5	0.1	0.17	0.25	4.2	7.224	0.32	4
4	I	2	693	1	1.45	1.55	1.8	0	0	1	1	1	55.2	33	247	5.2	5.2	1.5	0.1	0.17	0.25	4.2	7.224	0.32	4
4	I	2	1013	1	1.5	1.75	2.2	0	0	1	1	1	55.2	33	247	5.2	5.2	1.5	0.1	0.17	0.25	4.2	7.224	0.32	4
4	I	2	707	1.1	1.4	1.5	2	0	0	1	1	1	55.2	33	247	5.2	5.2	1.5	0.1	0.17	0.25	4.2	7.224	0.32	4
4	I	2	203065	1.3	NA	NA	NA	NA	NA	0	NA	NA	55.2	33	247	5.2	5.2	1.5	0.1	0.17	0.25	4.2	7.224	0.32	4
4	I	2	705	1.5	1.5	1.5	1.8	0	0	1	1	1	55.2	33	247	5.2	5.2	1.5	0.1	0.17	0.25	4.2	7.224	0.32	4
4	I	2	338143	1.5	1.67	1.9	1.85	0	0	1	1	1	55.2	33	247	5.2	5.2	1.5	0.1	0.17	0.25	4.2	7.224	0.32	4
4	I	2	338127	1.5	1.7	2	1.75	0	0	1	1	1	55.2	33	247	5.2	5.2	1.5	0.1	0.17	0.25	4.2	7.224	0.32	4
4	I	2	688	1.5	1.7	1.85	2	0	0	1	1	1	55.2	33	247	5.2	5.2	1.5	0.1	0.17	0.25	4.2	7.224	0.32	4
4	I	2	706	1.5	2	2.5	3.5	0	0	1	1	1	55.2	33	247	5.2	5.2	1.5	0.1	0.17	0.25	4.2	7.224	0.32	4
4	I	2	699	1.5	2	2.5	3.5	0	0	1	1	1	55.2	33	247	5.2	5.2	1.5	0.1	0.17	0.25	4.2	7.224	0.32	4
4	I	2	338142	1.6	1.6	1.8	0.6	0	0	1	1	1	55.2	33	247	5.2	5.2	1.5	0.1	0.17	0.25	4.2	7.224	0.32	4
4	I	2	704	1.67	1.8	2	1.5	0	0	1	1	1	55.2	33	247	5.2	5.2	1.5	0.1	0.17	0.25	4.2	7.224	0.32	4
4	I	2	369013	1.67	2	2.5	NA	0	0	1	1	0	55.2	33	247	5.2	5.2	1.5	0.1	0.17	0.25	4.2	7.224	0.32	4
4	I	2	369017	1.8	2.2	2.5	2.1	0	0	1	1	1	55.2	33	247	5.2	5.2	1.5	0.1	0.17	0.25	4.2	7.224	0.32	4
4	I	2	369018	2	2	2.2	1.7	0	0	1	1	1	55.2	33	247	5.2	5.2	1.5	0.1	0.17	0.25	4.2	7.224	0.32	4
4	I	2	206791	2	2	2.5	2.5	0	0	1	1	1	55.2	33	247	5.2	5.2	1.5	0.1	0.17	0.25	4.2	7.224	0.32	4
4	I	2	690	2	2.1	2.3	3	0	0	1	1	1	55.2	33	247	5.2	5.2	1.5	0.1	0.17	0.25	4.2	7.224	0.32	4
4	I	2	338126	2	2.2	2.5	1.1	0	0	1	1	1	55.2	33	247	5.2	5.2	1.5	0.1	0.17	0.25	4.2	7.224	0.32	4
4	I	2	689	2	2.2	2.55	2.5	0	0	1	1	1	55.2	33	247	5.2	5.2	1.5	0.1	0.17	0.25	4.2	7.224	0.32	4
4	I	2	692	2	2.3	2.5	2.8	0	0	1	1	1	55.2	33	247	5.2	5.2	1.5	0.1	0.17	0.25	4.2	7.224	0.32	4
4	I	2	680	2	2.3	2.5	3.5	0	0	1	1	1	55.2	33	247	5.2	5.2	1.5	0.1	0.17	0.25	4.2	7.224	0.32	4
4	I	2	369027	2	2.4	3	NA	0	0	1	1	0	55.2	33	247	5.2	5.2	1.5	0.1	0.17	0.25	4.2	7.224	0.32	4
4	I	2	694	2	2.5	3	3	0	0	1	1	1	55.2	33	247	5.2	5.2	1.5	0.1	0.17	0.25	4.2	7.224	0.32	4
4	I	2	1008	2	2.5	2.65	3	0	0	1	1	1	55.2	33	247	5.2	5.2	1.5	0.1	0.17	0.25	4.2	7.224	0.32	4
4	I	2	685	2.5	2.5	2.5	2.5	0	0	1	1	1	55.2	33	247	5.2	5.2	1.5	0.1	0.17	0.25	4.2	7.224	0.32	4
4	I	2	369019	2.5	3	3	3	0	0	1	1	1	55.2	33	247	5.2	5.2	1.5	0.1	0.17	0.25	4.2	7.224	0.32	4
4	I	2	691	2.5	3	3	3.8	0	0	1	1	1	55.2	33	247	5.2	5.2	1.5	0.1	0.17	0.25	4.2	7.224	0.32	4
4	I	2	369062	2.5	3	3.3	3	0	0	1	1	1	55.2	33	247	5.2	5.2	1.5	0.1	0.17	0.25	4.2	7.224	0.32	4
4	I	2	369042	2.5	3	3.3	4	0	0	1	1	1	55.2	33	247	5.2	5.2	1.5	0.1	0.17	0.25	4.2	7.224	0.32	4
4	I	2	369008	2.5	3	3.3	2.8	0	0	1	1	1	55.2	33	247	5.2	5.2	1.5	0.1	0.17	0.25	4.2	7.224	0.32	4
4	I	2	338128	3	3	3.5	0.5	0	0	1	1	1	55.2	33	247	5.2	5.2	1.5	0.1	0.17	0.25	4.2	7.224	0.32	4
4	I	2	698	3	3.3	3.7	4	0	0	1	1	1	55.2	33	247	5.2	5.2	1.5	0.1	0.17	0.25	4.2	7.224	0.32	4
4	I	2	369043	3	3.3	3.8	4.3	0	0	1	1	1	55.2	33	247	5.2	5.2	1.5	0.1	0.17	0.25	4.2	7.224	0.32	4
4	I	2	687	3	3.5	4	4	0	0	1	1	1	55.2	33	247	5.2	5.2	1.5	0.1	0.17	0.25	4.2	7.224	0.32	4
4	I	2	369028	3	3.6	4	4	0	0	1	1	1	55.2	33	247	5.2	5.2	1.5	0.1	0.17	0.25	4.2	7.224	0.32	4
4	I	2	369056	3.5	3.8	4	4	0	0	1	1	1	55.2	33	247	5.2	5.2	1.5	0.1	0.17	0.25	4.2	7.224	0.32	4
4	I	2	701	3.5	3.8	4.3	4.5	0	0	1	1	1	55.2	33	247	5.2	5.2	1.5	0.1	0.17	0.25	4.2	7.224	0.32	4
4	I	2	369039	3.5	4	4.1	NA	0	0	1	1	0	55.2	33	247	5.2	5.2	1.5	0.1	0.17	0.25	4.2	7.224	0.32	4
4	I	2	695	3.8	4	4.3	5	0	0	1	1	1	55.2	33	247	5.2	5.2	1.5	0.1	0.17	0.25	4.2	7.224	0.32	4
4	I	2	1009	3.8	4.2	4.5	5	0	0	1	1	1	55.2	33	247	5.2	5.2	1.5	0.1	0.17	0.25	4.2	7.224	0.32	4
4	I	2	369063	4	4	4.3	4.2	0	0	1	1	1	55.2	33	247	5.2	5.2	1.5	0.1	0.17	0.25	4.2	7.224	0.32	4
4	I	2	203057	4	4	4.5	5	0	0	1	1	1	55.2	33	247	5.2	5.2	1.5	0.1	0.17	0.25	4.2	7.224	0.32	4
4	I	2	369057	4	4	4	NA	1	0	1	1	0	55.2	33	247	5.2	5.2	1.5	0.1	0.17	0.25	4.2	7.224	0.32	4
4	I	2	1015	4	4.3	5	5	0	0	1	1	1	55.2	33	247	5.2	5.2	1.5	0.1	0.17	0.25	4.2	7.224	0.32	4
4	I	2	1012	4	4.5	5	5	0	0	1	1	1	55.2	33	247	5.2	5.2	1.5	0.1	0.17	0.25	4.2	7.224	0.32	4
4	I	2	369007	4	4.5	5	3.5	0	0	1	1	1	55.2	33	247	5.2	5.2	1.5	0.1	0.17	0.25	4.2	7.224	0.32	4
4	I	2	206745	4	4.5	4.9	6	0	0	1	1	1	55.2	33	247	5.2	5.2	1.5	0.1	0.17	0.25	4.2	7.224	0.32	4
4	I	2	684	4	4.5	5.1	5.5	0	0	1	1	1	55.2	33	247	5.2	5.2	1.5	0.1	0.17	0.25	4.2	7.224	0.32	4
4	I	2	1014	4	4.3	4.7	5	0	2	1	1	1	55.2	33	247	5.2	5.2	1.5	0.1	0.17	0.25	4.2	7.224	0.32	4
4	I	2	203062	4.5	4.7	5	5	0	0	1	1	1	55.2	33	247	5.2	5.2	1.5	0.1	0.17	0.25	4.2	7.224	0.32	4
4	I	2	369044	4.5	5	5.25	6	1	0	1	1	1	55.2	33	247	5.2	5.2	1.5	0.1	0.17	0.25	4.2	7.224	0.32	4
4	I	2	697	4.7	5	5.2	5.5	1	0	1	1	1	55.2	33	247	5.2	5.2	1.5	0.1	0.17	0.25	4.2	7.224	0.32	4
4	I	2	203030	4.8	5.2	5.4	6	1	0	1	1	1	55.2	33	247	5.2	5.2	1.5	0.1	0.17	0.25	4.2	7.224	0.32	4
4	I	2	1016	5	5	5.2	4.8	0	0	1	1	1	55.2	33	247	5.2	5.2	1.5	0.1	0.17	0.25	4.2	7.224	0.32	4
4	I	2	338191	5	5.3	5.6	5.3	0	0	1	1	1	55.2	33	247	5.2	5.2	1.5	0.1	0.17	0.25	4.2	7.224	0.32	4
4	I	2	703	5	5.5	6	6	0	0	1	1	1	55.2	33	247	5.2	5.2	1.5	0.1	0.17	0.25	4.2	7.224	0.32	4
4	I	2	369012	5	5	5.5	5	1	1	1	1	1	55.2	33	247	5.2	5.2	1.5	0.1	0.17	0.25	4.2	7.224	0.32	4
4	I	2	681	5.5	6	6	6	0	0	1	1	1	55.2	33	247	5.2	5.2	1.5	0.1	0.17	0.25	4.2	7.224	0.32	4
4	I	2	696	5.5	6	6	6	3	0	1	1	1	55.2	33	247	5.2	5.2	1.5	0.1	0.17	0.25	4.2	7.224	0.32	4
4	I	2	369060	5.65	5.9	6.1	NA	0	0	1	1	0	55.2	33	247	5.2	5.2	1.5	0.1	0.17	0.25	4.2	7.224	0.32	4
4	I	2	203038	6	6.2	7	6.5	0	0	1	1	1	55.2	33	247	5.2	5.2	1.5	0.1	0.17	0.25	4.2	7.224	0.32	4
4	I	2	702	7	7	7	7.5	0	1	1	1	1	55.2	33	247	5.2	5.2	1.5	0.1	0.17	0.25	4.2	7.224	0.32	4
4	I	2	203060	1.5	1.5	1.65	1.3	NA	NA	1	1	1	55.2	33	247	5.2	5.2	1.5	0.1	0.17	0.25	4.2	7.224	0.32	4
5	H	1	206841	0.14	0.25	NA	NA	NA	NA	1	0	NA	50.5	35.6	663	6	2.6	0.8	0	0.07	0.26	4.9	8.428	0.28	4
5	H	1	632	0.15	0.31	0.33	0.2	NA	NA	1	1	1	50.5	35.6	663	6	2.6	0.8	0	0.07	0.26	4.9	8.428	0.28	4
5	H	1	206820	0.19	NA	NA	NA	NA	NA	0	NA	NA	50.5	35.6	663	6	2.6	0.8	0	0.07	0.26	4.9	8.428	0.28	4
5	H	1	206839	0.21	0.38	0.34	NA	NA	NA	1	1	0	50.5	35.6	663	6	2.6	0.8	0	0.07	0.26	4.9	8.428	0.28	4
5	H	1	206843	0.3	0.3	0.33	NA	NA	NA	1	1	0	50.5	35.6	663	6	2.6	0.8	0	0.07	0.26	4.9	8.428	0.28	4
5	H	1	206842	0.31	0.35	0.39	NA	NA	NA	1	1	0	50.5	35.6	663	6	2.6	0.8	0	0.07	0.26	4.9	8.428	0.28	4
5	H	2	206845	0.08	NA	NA	NA	NA	NA	0	NA	NA	48.5	36.1	833	6	2.6	0.8	0	0.07	0.26	4.9	8.428	0.28	4
5	H	2	206840	0.11	NA	NA	NA	NA	NA	0	NA	NA	48.5	36.1	833	6	2.6	0.8	0	0.07	0.26	4.9	8.428	0.28	4
5	H	2	642	0.14	0.14	0.2	0.28	NA	NA	1	1	1	48.5	36.1	833	6	2.6	0.8	0	0.07	0.26	4.9	8.428	0.28	4
5	H	2	206844	0.14	NA	NA	NA	NA	NA	0	NA	NA	48.5	36.1	833	6	2.6	0.8	0	0.07	0.26	4.9	8.428	0.28	4
5	H	2	206824	0.17	0.53	NA	NA	NA	NA	1	0	NA	48.5	36.1	833	6	2.6	0.8	0	0.07	0.26	4.9	8.428	0.28	4
5	H	2	206832	0.18	NA	NA	NA	NA	NA	0	NA	NA	48.5	36.1	833	6	2.6	0.8	0	0.07	0.26	4.9	8.428	0.28	4
5	H	2	206846	0.19	NA	NA	NA	NA	NA	0	NA	NA	48.5	36.1	833	6	2.6	0.8	0	0.07	0.26	4.9	8.428	0.28	4
5	H	2	206815	0.22	NA	NA	NA	NA	NA	0	NA	NA	48.5	36.1	833	6	2.6	0.8	0	0.07	0.26	4.9	8.428	0.28	4
5	H	2	206875	0.23	0.24	0.38	NA	NA	NA	1	1	0	48.5	36.1	833	6	2.6	0.8	0	0.07	0.26	4.9	8.428	0.28	4
5	H	2	647	0.24	0.24	0.36	0.4	NA	NA	1	1	1	48.5	36.1	833	6	2.6	0.8	0	0.07	0.26	4.9	8.428	0.28	4
5	H	2	206825	0.26	NA	NA	NA	NA	NA	0	NA	NA	48.5	36.1	833	6	2.6	0.8	0	0.07	0.26	4.9	8.428	0.28	4
5	H	2	206829	0.32	NA	NA	NA	NA	NA	0	NA	NA	48.5	36.1	833	6	2.6	0.8	0	0.07	0.26	4.9	8.428	0.28	4
5	H	2	648	0.34	0.37	0.42	0.9	NA	NA	1	1	1	48.5	36.1	833	6	2.6	0.8	0	0.07	0.26	4.9	8.428	0.28	4
5	H	2	206809	0.37	0.54	0.69	NA	NA	NA	1	1	0	48.5	36.1	833	6	2.6	0.8	0	0.07	0.26	4.9	8.428	0.28	4
5	H	2	206819	0.38	0.49	NA	NA	NA	NA	1	0	NA	48.5	36.1	833	6	2.6	0.8	0	0.07	0.26	4.9	8.428	0.28	4
5	H	2	206827	0.39	0.49	NA	NA	NA	NA	1	0	NA	48.5	36.1	833	6	2.6	0.8	0	0.07	0.26	4.9	8.428	0.28	4
5	H	2	206861	0.41	0.42	NA	NA	NA	NA	1	0	NA	48.5	36.1	833	6	2.6	0.8	0	0.07	0.26	4.9	8.428	0.28	4
5	H	2	203646	0.48	0.6	NA	NA	NA	NA	1	0	NA	48.5	36.1	833	6	2.6	0.8	0	0.07	0.26	4.9	8.428	0.28	4
5	H	2	206837	0.57	0.58	NA	NA	NA	NA	1	0	NA	48.5	36.1	833	6	2.6	0.8	0	0.07	0.26	4.9	8.428	0.28	4
5	H	2	206859	0.57	0.64	NA	NA	NA	NA	1	0	NA	48.5	36.1	833	6	2.6	0.8	0	0.07	0.26	4.9	8.428	0.28	4
5	H	2	206860	0.59	0.65	NA	NA	NA	NA	1	0	NA	48.5	36.1	833	6	2.6	0.8	0	0.07	0.26	4.9	8.428	0.28	4
5	H	2	206828	0.64	0.72	NA	NA	NA	NA	1	0	NA	48.5	36.1	833	6	2.6	0.8	0	0.07	0.26	4.9	8.428	0.28	4
5	H	2	206823	0.65	0.68	NA	NA	NA	NA	1	0	NA	48.5	36.1	833	6	2.6	0.8	0	0.07	0.26	4.9	8.428	0.28	4
5	H	2	206831	0.7	0.74	NA	NA	NA	NA	1	0	NA	48.5	36.1	833	6	2.6	0.8	0	0.07	0.26	4.9	8.428	0.28	4
5	H	2	203611	0.75	1	NA	NA	0	NA	1	0	NA	48.5	36.1	833	6	2.6	0.8	0	0.07	0.26	4.9	8.428	0.28	4
5	H	2	203643	0.9	0.9	NA	NA	0	NA	1	0	NA	48.5	36.1	833	6	2.6	0.8	0	0.07	0.26	4.9	8.428	0.28	4
5	H	2	203610	0.92	0.98	NA	NA	0	NA	1	0	NA	48.5	36.1	833	6	2.6	0.8	0	0.07	0.26	4.9	8.428	0.28	4
5	H	2	203606	0.93	1	NA	NA	0	NA	1	0	NA	48.5	36.1	833	6	2.6	0.8	0	0.07	0.26	4.9	8.428	0.28	4
5	H	1	206718	NA	0.21	0.46	NA	NA	NA	NA	1	0	50.5	35.6	663	6	2.6	0.8	0	0.07	0.26	4.9	8.428	0.28	4
5	H	2	206719	NA	0.11	0.3	NA	NA	NA	NA	1	0	48.5	36.1	833	6	2.6	0.8	0	0.07	0.26	4.9	8.428	0.28	4
5	H	2	206715	NA	0.21	0.31	NA	NA	NA	NA	1	0	48.5	36.1	833	6	2.6	0.8	0	0.07	0.26	4.9	8.428	0.28	4
5	H	2	646	NA	0.26	0.44	0.55	NA	NA	NA	1	1	48.5	36.1	833	6	2.6	0.8	0	0.07	0.26	4.9	8.428	0.28	4
5	H	2	206786	NA	0.26	NA	NA	NA	NA	NA	0	NA	48.5	36.1	833	6	2.6	0.8	0	0.07	0.26	4.9	8.428	0.28	4
5	H	2	203654	NA	0.44	NA	NA	NA	NA	NA	0	NA	48.5	36.1	833	6	2.6	0.8	0	0.07	0.26	4.9	8.428	0.28	4
5	H	2	645	NA	NA	0.17	0.24	NA	NA	NA	NA	1	48.5	36.1	833	6	2.6	0.8	0	0.07	0.26	4.9	8.428	0.28	4
5	H	2	653	NA	NA	NA	0.17	NA	NA	NA	NA	1	52.8	35.7	726	6	2.6	0.8	0	0.07	0.26	4.9	8.428	0.28	4
5	H	2	643	NA	NA	NA	0.19	NA	NA	NA	NA	1	52.8	35.7	726	6	2.6	0.8	0	0.07	0.26	4.9	8.428	0.28	4
5	H	2	644	NA	NA	NA	0.2	NA	NA	NA	NA	1	52.8	35.7	726	6	2.6	0.8	0	0.07	0.26	4.9	8.428	0.28	4
5	H	2	654	NA	NA	NA	0.27	NA	NA	NA	NA	1	52.8	35.7	726	6	2.6	0.8	0	0.07	0.26	4.9	8.428	0.28	4
5	H	1	627	1.7	1.8	2.2	2.3	0	0	1	1	1	50.5	35.6	663	6	2.6	0.8	0	0.07	0.26	4.9	8.428	0.28	4
5	H	1	631	2.2	2.5	3	2.4	0	0	1	1	1	50.5	35.6	663	6	2.6	0.8	0	0.07	0.26	4.9	8.428	0.28	4
5	H	1	635	2.2	2.7	3	3.3	0	0	1	1	1	50.5	35.6	663	6	2.6	0.8	0	0.07	0.26	4.9	8.428	0.28	4
5	H	1	626	2.2	2.5	3	4	0	2	1	1	1	50.5	35.6	663	6	2.6	0.8	0	0.07	0.26	4.9	8.428	0.28	4
5	H	1	623	2.3	2.5	2.8	3	0	0	1	1	1	50.5	35.6	663	6	2.6	0.8	0	0.07	0.26	4.9	8.428	0.28	4
5	H	1	629	2.3	2.8	3.2	2.5	0	0	1	1	1	50.5	35.6	663	6	2.6	0.8	0	0.07	0.26	4.9	8.428	0.28	4
5	H	1	621	2.8	3.3	3.8	4.8	0	3	1	1	1	50.5	35.6	663	6	2.6	0.8	0	0.07	0.26	4.9	8.428	0.28	4
5	H	1	633	2.8	3.5	4	4.3	0	6	1	1	1	50.5	35.6	663	6	2.6	0.8	0	0.07	0.26	4.9	8.428	0.28	4
5	H	1	637	3	3.5	3.5	4	0	NA	1	1	1	50.5	35.6	663	6	2.6	0.8	0	0.07	0.26	4.9	8.428	0.28	4
5	H	1	628	3.5	4	4.3	3.8	0	1	1	1	1	50.5	35.6	663	6	2.6	0.8	0	0.07	0.26	4.9	8.428	0.28	4
5	H	1	634	3.5	4.1	4.5	4.2	0	1	1	1	1	50.5	35.6	663	6	2.6	0.8	0	0.07	0.26	4.9	8.428	0.28	4
5	H	1	624	3.5	4	4.5	4.4	0	3	1	1	1	50.5	35.6	663	6	2.6	0.8	0	0.07	0.26	4.9	8.428	0.28	4
5	H	1	636	3.5	4	4.2	4.7	0	4	1	1	1	50.5	35.6	663	6	2.6	0.8	0	0.07	0.26	4.9	8.428	0.28	4
5	H	1	625	4	4	4.5	5.5	0	2	1	1	1	50.5	35.6	663	6	2.6	0.8	0	0.07	0.26	4.9	8.428	0.28	4
5	H	1	620	4	4.5	4.7	5	0	2	1	1	1	50.5	35.6	663	6	2.6	0.8	0	0.07	0.26	4.9	8.428	0.28	4
5	H	1	203688	4	5	5.3	NA	2	3	1	1	0	50.5	35.6	663	6	2.6	0.8	0	0.07	0.26	4.9	8.428	0.28	4
5	H	1	630	4	4.5	4.8	5	6	4	1	1	1	50.5	35.6	663	6	2.6	0.8	0	0.07	0.26	4.9	8.428	0.28	4
5	H	1	206877	4.2	NA	NA	NA	NA	NA	0	NA	NA	50.5	35.6	663	6	2.6	0.8	0	0.07	0.26	4.9	8.428	0.28	4
5	H	1	203660	4.5	5	5.2	NA	6	3	1	1	0	50.5	35.6	663	6	2.6	0.8	0	0.07	0.26	4.9	8.428	0.28	4
5	H	1	622	5	5.5	5.8	6.3	3	0	1	1	1	50.5	35.6	663	6	2.6	0.8	0	0.07	0.26	4.9	8.428	0.28	4
5	H	2	657	1.2	1.2	1.4	1.6	0	0	1	1	1	48.5	36.1	833	6	2.6	0.8	0	0.07	0.26	4.9	8.428	0.28	4
5	H	2	652	1.2	1.2	1.4	1.7	0	0	1	1	1	48.5	36.1	833	6	2.6	0.8	0	0.07	0.26	4.9	8.428	0.28	4
5	H	2	640	1.4	1.8	2.2	2.8	0	1	1	1	1	48.5	36.1	833	6	2.6	0.8	0	0.07	0.26	4.9	8.428	0.28	4
5	H	2	369078	1.42	NA	NA	NA	NA	NA	0	NA	NA	48.5	36.1	833	6	2.6	0.8	0	0.07	0.26	4.9	8.428	0.28	4
5	H	2	656	1.5	1.5	1.75	2	0	0	1	1	1	48.5	36.1	833	6	2.6	0.8	0	0.07	0.26	4.9	8.428	0.28	4
5	H	2	200113	1.5	2	NA	NA	0	NA	1	0	NA	48.5	36.1	833	6	2.6	0.8	0	0.07	0.26	4.9	8.428	0.28	4
5	H	2	638	1.7	1.8	2	2.4	0	0	1	1	1	48.5	36.1	833	6	2.6	0.8	0	0.07	0.26	4.9	8.428	0.28	4
5	H	2	655	1.8	2.2	2.5	2.8	0	0	1	1	1	48.5	36.1	833	6	2.6	0.8	0	0.07	0.26	4.9	8.428	0.28	4
5	H	2	659	2	2.5	3	3.3	0	2	1	1	1	48.5	36.1	833	6	2.6	0.8	0	0.07	0.26	4.9	8.428	0.28	4
5	H	2	650	3	3.2	3.4	4.5	7	4	1	1	1	48.5	36.1	833	6	2.6	0.8	0	0.07	0.26	4.9	8.428	0.28	4
5	H	2	639	3.1	3.5	4	4.3	0	3	1	1	1	48.5	36.1	833	6	2.6	0.8	0	0.07	0.26	4.9	8.428	0.28	4
5	H	2	203648	3.2	3.7	NA	NA	6	NA	1	0	NA	48.5	36.1	833	6	2.6	0.8	0	0.07	0.26	4.9	8.428	0.28	4
5	H	2	649	4	4.2	4.8	4.8	0	5	1	1	1	48.5	36.1	833	6	2.6	0.8	0	0.07	0.26	4.9	8.428	0.28	4
5	H	2	206894	4.5	NA	NA	NA	NA	NA	0	NA	NA	48.5	36.1	833	6	2.6	0.8	0	0.07	0.26	4.9	8.428	0.28	4
5	H	2	641	5	5.6	6.1	6.2	1	1	1	1	1	48.5	36.1	833	6	2.6	0.8	0	0.07	0.26	4.9	8.428	0.28	4
5	H	2	651	5	5.1	5.8	5.5	3	8	1	1	1	48.5	36.1	833	6	2.6	0.8	0	0.07	0.26	4.9	8.428	0.28	4
6	H	1	200175	0.2	NA	NA	NA	NA	NA	0	NA	NA	49.2	34.6	655	6.1	1.5	0.4	0.2	0.08	0.31	5.4	9.288	0.44	2.5
6	H	1	200198	0.6	0.66	NA	NA	NA	NA	1	0	NA	49.2	34.6	655	6.1	1.5	0.4	0.2	0.08	0.31	5.4	9.288	0.44	2.5
6	H	1	203633	0.76	0.9	1.2	NA	NA	NA	1	1	0	49.2	34.6	655	6.1	1.5	0.4	0.2	0.08	0.31	5.4	9.288	0.44	2.5
6	H	2	200199	0.61	NA	NA	NA	NA	NA	0	NA	NA	52.8	35.7	726	6.1	1.5	0.4	0.2	0.08	0.31	5.4	9.288	0.44	2.5
6	H	1	206716	NA	0.08	NA	NA	NA	NA	NA	0	NA	49.2	34.6	655	6.1	1.5	0.4	0.2	0.08	0.31	5.4	9.288	0.44	2.5
6	H	1	206722	NA	0.1	NA	NA	NA	NA	NA	0	NA	49.2	34.6	655	6.1	1.5	0.4	0.2	0.08	0.31	5.4	9.288	0.44	2.5
6	H	1	206721	NA	0.14	NA	NA	NA	NA	NA	0	NA	49.2	34.6	655	6.1	1.5	0.4	0.2	0.08	0.31	5.4	9.288	0.44	2.5
6	H	1	206720	NA	0.15	NA	NA	NA	NA	NA	0	NA	49.2	34.6	655	6.1	1.5	0.4	0.2	0.08	0.31	5.4	9.288	0.44	2.5
6	H	1	206711	NA	0.36	NA	NA	NA	NA	NA	0	NA	49.2	34.6	655	6.1	1.5	0.4	0.2	0.08	0.31	5.4	9.288	0.44	2.5
6	H	1	206724	NA	0.42	NA	NA	NA	NA	NA	0	NA	49.2	34.6	655	6.1	1.5	0.4	0.2	0.08	0.31	5.4	9.288	0.44	2.5
6	H	1	206712	NA	0.45	NA	NA	NA	NA	NA	0	NA	49.2	34.6	655	6.1	1.5	0.4	0.2	0.08	0.31	5.4	9.288	0.44	2.5
6	H	1	206726	NA	0.56	NA	NA	NA	NA	NA	0	NA	49.2	34.6	655	6.1	1.5	0.4	0.2	0.08	0.31	5.4	9.288	0.44	2.5
6	H	1	338152	NA	NA	0.14	NA	NA	NA	NA	NA	0	49.2	34.6	655	6.1	1.5	0.4	0.2	0.08	0.31	5.4	9.288	0.44	2.5
6	H	1	338156	NA	NA	0.17	NA	NA	NA	NA	NA	0	49.2	34.6	655	6.1	1.5	0.4	0.2	0.08	0.31	5.4	9.288	0.44	2.5
6	H	1	338157	NA	NA	0.18	NA	NA	NA	NA	NA	0	49.2	34.6	655	6.1	1.5	0.4	0.2	0.08	0.31	5.4	9.288	0.44	2.5
6	H	1	338153	NA	NA	0.21	NA	NA	NA	NA	NA	0	49.2	34.6	655	6.1	1.5	0.4	0.2	0.08	0.31	5.4	9.288	0.44	2.5
6	H	2	548	NA	NA	NA	0.13	NA	NA	NA	NA	1	52.8	35.7	726	6.1	1.5	0.4	0.2	0.08	0.31	5.4	9.288	0.44	2.5
6	H	2	556	NA	NA	NA	0.6	NA	NA	NA	NA	1	52.8	35.7	726	6.1	1.5	0.4	0.2	0.08	0.31	5.4	9.288	0.44	2.5
6	H	1	483	1	1	1.5	1.5	0	0	1	1	1	49.2	34.6	655	6.1	1.5	0.4	0.2	0.08	0.31	5.4	9.288	0.44	2.5
6	H	1	533	1.3	1.8	2	2.8	0	0	1	1	1	49.2	34.6	655	6.1	1.5	0.4	0.2	0.08	0.31	5.4	9.288	0.44	2.5
6	H	1	489	1.5	1.7	2	2.2	0	0	1	1	1	49.2	34.6	655	6.1	1.5	0.4	0.2	0.08	0.31	5.4	9.288	0.44	2.5
6	H	1	512	1.5	2	2.3	2.5	0	0	1	1	1	49.2	34.6	655	6.1	1.5	0.4	0.2	0.08	0.31	5.4	9.288	0.44	2.5
6	H	1	511	1.5	2	2.5	2.5	0	0	1	1	1	49.2	34.6	655	6.1	1.5	0.4	0.2	0.08	0.31	5.4	9.288	0.44	2.5
6	H	1	206755	1.5	NA	NA	NA	NA	NA	0	NA	NA	49.2	34.6	655	6.1	1.5	0.4	0.2	0.08	0.31	5.4	9.288	0.44	2.5
6	H	1	200143	1.5	NA	NA	NA	NA	NA	0	NA	NA	49.2	34.6	655	6.1	1.5	0.4	0.2	0.08	0.31	5.4	9.288	0.44	2.5
6	H	1	528	1.7	2	2.3	2	0	0	1	1	1	49.2	34.6	655	6.1	1.5	0.4	0.2	0.08	0.31	5.4	9.288	0.44	2.5
6	H	1	485	1.7	2	2.5	3	0	0	1	1	1	49.2	34.6	655	6.1	1.5	0.4	0.2	0.08	0.31	5.4	9.288	0.44	2.5
6	H	1	515	1.7	2.2	2.5	2.3	0	0	1	1	1	49.2	34.6	655	6.1	1.5	0.4	0.2	0.08	0.31	5.4	9.288	0.44	2.5
6	H	1	525	1.75	2.2	2.5	3	0	0	1	1	1	49.2	34.6	655	6.1	1.5	0.4	0.2	0.08	0.31	5.4	9.288	0.44	2.5
6	H	1	493	1.8	2.2	2.4	3	0	0	1	1	1	49.2	34.6	655	6.1	1.5	0.4	0.2	0.08	0.31	5.4	9.288	0.44	2.5
6	H	1	507	1.9	2.2	2.5	2.5	0	0	1	1	1	49.2	34.6	655	6.1	1.5	0.4	0.2	0.08	0.31	5.4	9.288	0.44	2.5
6	H	1	206885	1.9	2.2	2.65	NA	0	0	1	1	0	49.2	34.6	655	6.1	1.5	0.4	0.2	0.08	0.31	5.4	9.288	0.44	2.5
6	H	1	516	1.9	2.3	2.5	2	0	0	1	1	1	49.2	34.6	655	6.1	1.5	0.4	0.2	0.08	0.31	5.4	9.288	0.44	2.5
6	H	1	519	2	2.1	2.5	2.1	0	0	1	1	1	49.2	34.6	655	6.1	1.5	0.4	0.2	0.08	0.31	5.4	9.288	0.44	2.5
6	H	1	499	2	2.3	2.6	3	0	0	1	1	1	49.2	34.6	655	6.1	1.5	0.4	0.2	0.08	0.31	5.4	9.288	0.44	2.5
6	H	1	518	2	2.5	3	3	0	0	1	1	1	49.2	34.6	655	6.1	1.5	0.4	0.2	0.08	0.31	5.4	9.288	0.44	2.5
6	H	1	497	2	2.5	3	3	0	0	1	1	1	49.2	34.6	655	6.1	1.5	0.4	0.2	0.08	0.31	5.4	9.288	0.44	2.5
6	H	1	510	2	2.5	3	3	0	0	1	1	1	49.2	34.6	655	6.1	1.5	0.4	0.2	0.08	0.31	5.4	9.288	0.44	2.5
6	H	1	496	2	2.5	3	3	1	0	1	1	1	49.2	34.6	655	6.1	1.5	0.4	0.2	0.08	0.31	5.4	9.288	0.44	2.5
6	H	1	530	2	2.5	2.8	2.5	1	0	1	1	1	49.2	34.6	655	6.1	1.5	0.4	0.2	0.08	0.31	5.4	9.288	0.44	2.5
6	H	1	200134	2	NA	NA	NA	NA	NA	0	NA	NA	49.2	34.6	655	6.1	1.5	0.4	0.2	0.08	0.31	5.4	9.288	0.44	2.5
6	H	1	513	2.2	2.2	2.4	2.4	0	0	1	1	1	49.2	34.6	655	6.1	1.5	0.4	0.2	0.08	0.31	5.4	9.288	0.44	2.5
6	H	1	532	2.2	2.3	2.5	3	2	0	1	1	1	49.2	34.6	655	6.1	1.5	0.4	0.2	0.08	0.31	5.4	9.288	0.44	2.5
6	H	1	522	2.2	2.5	3	4	0	0	1	1	1	49.2	34.6	655	6.1	1.5	0.4	0.2	0.08	0.31	5.4	9.288	0.44	2.5
6	H	1	206879	2.2	2.5	3	NA	0	2	1	1	0	49.2	34.6	655	6.1	1.5	0.4	0.2	0.08	0.31	5.4	9.288	0.44	2.5
6	H	1	531	2.3	2.3	3	3	0	0	1	1	1	49.2	34.6	655	6.1	1.5	0.4	0.2	0.08	0.31	5.4	9.288	0.44	2.5
6	H	1	526	2.3	2.5	3	3.2	0	0	1	1	1	49.2	34.6	655	6.1	1.5	0.4	0.2	0.08	0.31	5.4	9.288	0.44	2.5
6	H	1	480	2.3	2.5	2.7	3	0	0	1	1	1	49.2	34.6	655	6.1	1.5	0.4	0.2	0.08	0.31	5.4	9.288	0.44	2.5
6	H	1	505	2.3	2.6	3	3.5	0	0	1	1	1	49.2	34.6	655	6.1	1.5	0.4	0.2	0.08	0.31	5.4	9.288	0.44	2.5
6	H	1	482	2.3	3	3.3	3	0	0	1	1	1	49.2	34.6	655	6.1	1.5	0.4	0.2	0.08	0.31	5.4	9.288	0.44	2.5
6	H	1	200136	2.3	NA	NA	NA	NA	NA	0	NA	NA	49.2	34.6	655	6.1	1.5	0.4	0.2	0.08	0.31	5.4	9.288	0.44	2.5
6	H	1	200135	2.3	NA	NA	NA	NA	NA	0	NA	NA	49.2	34.6	655	6.1	1.5	0.4	0.2	0.08	0.31	5.4	9.288	0.44	2.5
6	H	1	520	2.5	2.8	3	3	1	0	1	1	1	49.2	34.6	655	6.1	1.5	0.4	0.2	0.08	0.31	5.4	9.288	0.44	2.5
6	H	1	509	2.5	3	3.5	3.4	0	0	1	1	1	49.2	34.6	655	6.1	1.5	0.4	0.2	0.08	0.31	5.4	9.288	0.44	2.5
6	H	1	502	2.5	3	3.3	4.5	0	2	1	1	1	49.2	34.6	655	6.1	1.5	0.4	0.2	0.08	0.31	5.4	9.288	0.44	2.5
6	H	1	529	2.8	3.3	3.5	4.5	0	0	1	1	1	49.2	34.6	655	6.1	1.5	0.4	0.2	0.08	0.31	5.4	9.288	0.44	2.5
6	H	1	523	3	3	3.3	3.5	0	0	1	1	1	49.2	34.6	655	6.1	1.5	0.4	0.2	0.08	0.31	5.4	9.288	0.44	2.5
6	H	1	200187	3	3	3.6	NA	0	0	1	1	0	49.2	34.6	655	6.1	1.5	0.4	0.2	0.08	0.31	5.4	9.288	0.44	2.5
6	H	1	481	3	3	3.7	2.5	0	0	1	1	1	49.2	34.6	655	6.1	1.5	0.4	0.2	0.08	0.31	5.4	9.288	0.44	2.5
6	H	1	504	3	3.1	3.4	3.3	0	0	1	1	1	49.2	34.6	655	6.1	1.5	0.4	0.2	0.08	0.31	5.4	9.288	0.44	2.5
6	H	1	517	3	3.5	3.7	4	0	0	1	1	1	49.2	34.6	655	6.1	1.5	0.4	0.2	0.08	0.31	5.4	9.288	0.44	2.5
6	H	1	500	3	3.5	3.9	4	0	0	1	1	1	49.2	34.6	655	6.1	1.5	0.4	0.2	0.08	0.31	5.4	9.288	0.44	2.5
6	H	1	200166	3	3	3.2	NA	0	2	1	1	0	49.2	34.6	655	6.1	1.5	0.4	0.2	0.08	0.31	5.4	9.288	0.44	2.5
6	H	1	506	3	3.3	3.6	4	0	3	1	1	1	49.2	34.6	655	6.1	1.5	0.4	0.2	0.08	0.31	5.4	9.288	0.44	2.5
6	H	1	498	3.1	3.3	3.7	4.8	1	0	1	1	1	49.2	34.6	655	6.1	1.5	0.4	0.2	0.08	0.31	5.4	9.288	0.44	2.5
6	H	1	501	3.1	3.5	4	5	2	2	1	1	1	49.2	34.6	655	6.1	1.5	0.4	0.2	0.08	0.31	5.4	9.288	0.44	2.5
6	H	1	521	3.1	3.5	3.75	4	0	3	1	1	1	49.2	34.6	655	6.1	1.5	0.4	0.2	0.08	0.31	5.4	9.288	0.44	2.5
6	H	1	494	3.2	3.4	3.6	4.5	6	0	1	1	1	49.2	34.6	655	6.1	1.5	0.4	0.2	0.08	0.31	5.4	9.288	0.44	2.5
6	H	1	503	3.2	3.5	4	5	2	0	1	1	1	49.2	34.6	655	6.1	1.5	0.4	0.2	0.08	0.31	5.4	9.288	0.44	2.5
6	H	1	488	3.5	4	4.3	5	0	0	1	1	1	49.2	34.6	655	6.1	1.5	0.4	0.2	0.08	0.31	5.4	9.288	0.44	2.5
6	H	1	486	3.5	4	4.3	4.3	4	0	1	1	1	49.2	34.6	655	6.1	1.5	0.4	0.2	0.08	0.31	5.4	9.288	0.44	2.5
6	H	1	206883	3.5	4	NA	NA	0	NA	1	0	NA	49.2	34.6	655	6.1	1.5	0.4	0.2	0.08	0.31	5.4	9.288	0.44	2.5
6	H	1	206890	4	4.5	5	NA	0	3	1	1	0	49.2	34.6	655	6.1	1.5	0.4	0.2	0.08	0.31	5.4	9.288	0.44	2.5
6	H	1	490	5	5.3	5.6	7	4	3	1	1	1	49.2	34.6	655	6.1	1.5	0.4	0.2	0.08	0.31	5.4	9.288	0.44	2.5
6	H	1	487	5	5.4	5.6	5.5	2	4	1	1	1	49.2	34.6	655	6.1	1.5	0.4	0.2	0.08	0.31	5.4	9.288	0.44	2.5
6	H	1	206753	7.5	NA	NA	NA	NA	NA	0	NA	NA	49.2	34.6	655	6.1	1.5	0.4	0.2	0.08	0.31	5.4	9.288	0.44	2.5
6	H	2	540	1	1.3	1.5	1.7	0	0	1	1	1	52.8	35.7	726	6.1	1.5	0.4	0.2	0.08	0.31	5.4	9.288	0.44	2.5
6	H	2	559	1.1	1.3	1.5	1.8	0	0	1	1	1	52.8	35.7	726	6.1	1.5	0.4	0.2	0.08	0.31	5.4	9.288	0.44	2.5
6	H	2	557	1.45	1.5	1.7	1.7	0	0	1	1	1	52.8	35.7	726	6.1	1.5	0.4	0.2	0.08	0.31	5.4	9.288	0.44	2.5
6	H	2	558	1.5	1.5	1.5	1.8	0	0	1	1	1	52.8	35.7	726	6.1	1.5	0.4	0.2	0.08	0.31	5.4	9.288	0.44	2.5
6	H	2	563	1.5	1.75	1.85	2.5	0	0	1	1	1	52.8	35.7	726	6.1	1.5	0.4	0.2	0.08	0.31	5.4	9.288	0.44	2.5
6	H	2	562	1.9	2.2	2.4	3.5	0	0	1	1	1	52.8	35.7	726	6.1	1.5	0.4	0.2	0.08	0.31	5.4	9.288	0.44	2.5
6	H	2	555	2	2.6	2.8	2.5	0	0	1	1	1	52.8	35.7	726	6.1	1.5	0.4	0.2	0.08	0.31	5.4	9.288	0.44	2.5
6	H	2	551	2.1	3	3.1	2.5	1	3	1	1	1	52.8	35.7	726	6.1	1.5	0.4	0.2	0.08	0.31	5.4	9.288	0.44	2.5
6	H	2	549	2.2	2.5	2.9	4	0	0	1	1	1	52.8	35.7	726	6.1	1.5	0.4	0.2	0.08	0.31	5.4	9.288	0.44	2.5
6	H	2	539	2.3	2.7	3	4.5	9	0	1	1	1	52.8	35.7	726	6.1	1.5	0.4	0.2	0.08	0.31	5.4	9.288	0.44	2.5
6	H	2	545	2.4	2.8	3	3.5	0	0	1	1	1	52.8	35.7	726	6.1	1.5	0.4	0.2	0.08	0.31	5.4	9.288	0.44	2.5
6	H	2	554	2.5	2.5	3	3.5	0	0	1	1	1	52.8	35.7	726	6.1	1.5	0.4	0.2	0.08	0.31	5.4	9.288	0.44	2.5
6	H	2	537	2.5	2.7	3	3.8	0	0	1	1	1	52.8	35.7	726	6.1	1.5	0.4	0.2	0.08	0.31	5.4	9.288	0.44	2.5
6	H	2	536	2.5	2.8	3	4	5	0	1	1	1	52.8	35.7	726	6.1	1.5	0.4	0.2	0.08	0.31	5.4	9.288	0.44	2.5
6	H	2	553	2.5	3	3.2	4.5	3	0	1	1	1	52.8	35.7	726	6.1	1.5	0.4	0.2	0.08	0.31	5.4	9.288	0.44	2.5
6	H	2	544	2.5	2.5	3	3.5	9	3	1	1	1	52.8	35.7	726	6.1	1.5	0.4	0.2	0.08	0.31	5.4	9.288	0.44	2.5
6	H	2	541	2.5	2.5	3	3.3	7	5	1	1	1	52.8	35.7	726	6.1	1.5	0.4	0.2	0.08	0.31	5.4	9.288	0.44	2.5
6	H	2	543	3	3.3	3.7	4.5	3	0	1	1	1	52.8	35.7	726	6.1	1.5	0.4	0.2	0.08	0.31	5.4	9.288	0.44	2.5
6	H	2	542	3	3	3.5	4	8	4	1	1	1	52.8	35.7	726	6.1	1.5	0.4	0.2	0.08	0.31	5.4	9.288	0.44	2.5
6	H	2	550	3	3.1	3.6	4.4	4	4	1	1	1	52.8	35.7	726	6.1	1.5	0.4	0.2	0.08	0.31	5.4	9.288	0.44	2.5
6	H	2	561	3	3.5	3.8	4	0	5	1	1	1	52.8	35.7	726	6.1	1.5	0.4	0.2	0.08	0.31	5.4	9.288	0.44	2.5
6	H	2	566	3.1	3.5	4	5	8	0	1	1	1	52.8	35.7	726	6.1	1.5	0.4	0.2	0.08	0.31	5.4	9.288	0.44	2.5
6	H	2	547	3.2	3.5	3.9	4	4	1	1	1	1	52.8	35.7	726	6.1	1.5	0.4	0.2	0.08	0.31	5.4	9.288	0.44	2.5
6	H	2	538	3.2	3.5	3.8	5	4	2	1	1	1	52.8	35.7	726	6.1	1.5	0.4	0.2	0.08	0.31	5.4	9.288	0.44	2.5
6	H	2	552	3.5	3.7	4	4.2	4	0	1	1	1	52.8	35.7	726	6.1	1.5	0.4	0.2	0.08	0.31	5.4	9.288	0.44	2.5
6	H	2	534	3.5	4	4.5	5	1	0	1	1	1	52.8	35.7	726	6.1	1.5	0.4	0.2	0.08	0.31	5.4	9.288	0.44	2.5
6	H	2	564	3.5	4	4.3	5	1	7	1	1	1	52.8	35.7	726	6.1	1.5	0.4	0.2	0.08	0.31	5.4	9.288	0.44	2.5
6	H	2	535	4	4	4	4	5	1	1	1	1	52.8	35.7	726	6.1	1.5	0.4	0.2	0.08	0.31	5.4	9.288	0.44	2.5
6	H	2	560	4	4.3	4.5	5	9	4	1	1	1	52.8	35.7	726	6.1	1.5	0.4	0.2	0.08	0.31	5.4	9.288	0.44	2.5
6	H	2	206717	4	4.5	NA	NA	3	NA	1	0	NA	52.8	35.7	726	6.1	1.5	0.4	0.2	0.08	0.31	5.4	9.288	0.44	2.5
6	H	2	546	5	5.3	6	6	0	0	1	1	1	52.8	35.7	726	6.1	1.5	0.4	0.2	0.08	0.31	5.4	9.288	0.44	2.5
6	H	2	200177	5	NA	NA	NA	NA	NA	0	NA	NA	52.8	35.7	726	6.1	1.5	0.4	0.2	0.08	0.31	5.4	9.288	0.44	2.5
6	H	2	206864	5.25	NA	NA	NA	NA	NA	0	NA	NA	52.8	35.7	726	6.1	1.5	0.4	0.2	0.08	0.31	5.4	9.288	0.44	2.5

## Sheet: Info
Treatments:
L= low
I= intermediate
H= high
Seedlings measurements are in red
