# Supplementary material for: The importance of individuals of different sizes in the population maintenance of a palm species used by the Fulni-ô Indigenous People in northeast Brazil
Source: PeerJ. 2025 Aug 13;13:e19739. doi: 10.7717/peerj.19739 (PMC12357544; doi:10.7717/peerj.19739)
Supplement: Supplemental Information 2 — leaves14: total leaves in July 2014; leaves15: total leaves in June 2015; newleav14-15: new leaves between July 2014 and June 205; harvleav14-15: harvested leaves between July 2014 and June 205. [file peerj-13-19739-s002.xlsx]

## Sheet: total sample
Treat	Plot	Plant	leaves14	newleav14-15	leaves15	havleav14-15
L	1	200108	12	7	11	8
L	1	200109	8	5	12	1
L	1	200140	8	5	9	4
L	1	203638	7	5	7	5
L	1	200184	8	6	14	0
L	1	206818	13	6	14	5
L	1	203641	7	4	8	3
L	1	200110	19	5	17	7
L	1	200111	10	4	14	0
L	1	200174	11	4	13	2
L	1	206817	7	4	10	1
L	1	200172	9	4	12	1
L	1	206873	5	4	7	2
L	1	203666	6	4	6	4
L	1	203665	8	4	11	1
L	1	203667	8	4	12	0
L	1	203668	5	4	9	0
L	1	203603	13	4	16	1
L	1	203684	10	5	13	2
L	1	338197	10	6	12	4
L	1	203686	10	5	14	1
L	1	203651	10	4	14	0
L	1	203609	11	4	12	3
L	1	203699	11	4	12	3
L	1	203607	8	4	9	3
L	1	203632	12	4	13	3
L	1	203612	11	4	11	4
L	1	200123	6	3	8	1
L	1	200124	10	4	14	0
L	1	200126	8	5	13	0
L	1	200122	7	4	8	3
L	1	206725	9	4	13	0
L	1	206787	8	4	9	3
L	1	206704	10	4	14	0
L	1	203664	9	4	11	2
L	1	203663	7	7	10	4
L	1	206821	8	3	NA	NA
L	1	203663	NA	NA	NA	NA
L	2	203613	8	5	8	5
L	2	338170	5	3	6	2
L	2	203614	8	6	12	2
L	2	203608	5	8	8	5
L	2	203616	7	6	11	2
L	2	203634	9	6	10	5
L	2	203618	3	6	5	4
L	2	203619	8	4	11	1
L	2	203622	9	5	13	1
L	2	203670	8	4	12	0
L	2	203676	17	4	15	6
L	2	200194	12	4	12	4
L	2	203627	3	4	4	3
L	2	203677	2	2	2	2
L	2	203659	18	4	19	3
L	2	203658	13	4	16	1
L	2	203626	14	4	14	4
L	2	203628	20	4	23	1
L	2	338167	4	5	7	2
L	2	203602	8	4	12	0
L	2	203601	8	5	13	0
L	2	200173	10	5	15	0
L	2	200190	8	5	10	3
L	2	200191	8	5	13	0
L	2	203657	9	5	9	5
L	2	200185	NA	NA	NA	NA
L	2	203604	NA	NA	NA	NA
L	1	203696	10	5	6	9
L	1	203695	9	5	13	1
L	1	203683	19	4	21	2
L	1	203680	29	4	14	19
L	1	203694	5	6	11	0
L	1	203681	7	5	9	3
L	1	338171	6	4	9	1
L	1	338172	12	5	11	6
L	1	200169	18	5	17	6
L	1	206762	9	5	18	-4
L	1	338168	13	5	22	-4
L	1	200116	10	5	18	-3
L	1	338173	22	6	26	2
L	1	200105	16	5	13	8
L	1	200106	12	4	12	4
L	1	200171	21	7	22	6
L	2	203689	26	6	29	3
L	2	200115	14	6	9	11
L	2	200192	21	5	14	12
I	1	203629	24	6	24	6
I	1	206761	12	5	13	4
I	1	200142	24	5	18	11
I	2	206706	10	5	5	10
I	2	203624	11	6	4	13
I	2	203625	21	4	20	5
I	2	203656	5	4	7	2
I	2	203672	15	6	21	0
I	2	206754	17	5	21	1
I	2	203673	12	5	12	5
I	2	203605	10	4	14	0
I	2	206737	14	4	18	0
I	2	206780	18	5	12	11
I	2	200183	17	5	24	-2
I	2	200181	20	4	14	10
I	2	338175	13	4	12	5
I	2	206783	16	4	20	0
I	2	203652	16	6	10	12
I	2	203671	16	4	14	6
I	2	206776	16	4	20	0
I	2	206782	12	4	22	-6
I	2	206752	12	4	12	4
I	2	206757	12	4	16	0
I	2	206756	16	4	14	6
I	2	206774	10	5	15	0
I	2	206772	15	5	16	4
I	2	206768	21	4	20	5
I	2	206769	20	4	24	0
I	2	206794	12	5	17	0
I	2	203697	12	5	12	5
I	2	206796	NA	NA	NA	NA
I	2	203032	NA	NA	NA	NA
I	2	206707	NA	NA	NA	NA
I	2	206709	NA	NA	NA	NA
I	2	203623	NA	NA	NA	NA
I	2	206727	NA	NA	NA	NA
I	2	203653	NA	NA	NA	NA
I	2	206810	NA	NA	NA	NA
I	2	203617	NA	NA	NA	NA
I	2	203621	NA	NA	NA	NA
I	2	203615	NA	NA	NA	NA
I	2	206708	NA	NA	NA	NA
I	2	200197	NA	NA	NA	NA
I	2	200125	NA	NA	NA	NA
I	2	206767	NA	NA	NA	NA
I	2	206766	NA	NA	NA	NA
I	2	206748	NA	NA	NA	NA
I	2	206749	NA	NA	NA	NA
I	2	206750	NA	NA	NA	NA
I	2	206705	NA	NA	NA	NA
I	2	206747	NA	NA	NA	NA
I	2	206746	NA	NA	NA	NA
I	2	338139	NA	NA	NA	NA
I	2	338108	NA	NA	NA	NA
I	1	206788	7	6	9	4
I	1	369072	5	7	10	2
I	1	369099	9	6	15	0
I	1	369085	18	4	20	2
I	1	338190	10	4	14	0
I	1	338182	4	3	5	2
I	1	338179	2	4	6	0
I	1	369097	6	5	4	7
I	1	369068	10	4	10	4
I	1	369071	4	6	5	5
I	1	369076	9	4	6	7
I	1	338178	3	3	4	2
I	1	200130	2	3	3	2
I	1	369050	26	6	25	7
I	1	369049	10	6	4	12
I	1	369055	5	4	8	1
I	1	369053	6	4	6	4
I	1	369052	9	5	14	0
I	1	369081	8	5	13	0
I	1	203018	5	4	6	3
I	1	203017	2	3	1	4
I	1	203019	15	5	15	5
I	1	369079	5	4	5	4
I	1	369054	21	5	25	1
I	1	203016	14	6	13	7
I	1	203015	8	5	10	3
I	1	203013	16	4	16	4
I	1	203048	8	3	9	2
I	1	203049	3	4	4	3
I	1	203047	11	5	12	4
I	1	206723	12	4	16	0
I	1	369080	4	4	5	3
I	1	203024	7	5	10	2
I	1	206790	7	4	8	3
I	1	369073	9	5	10	4
I	1	338180	4	4	5	3
I	1	203034	10	5	14	1
I	1	203035	13	5	15	3
I	1	203045	30	4	22	12
I	1	203096	4	4	8	0
I	1	203099	3	5	4	4
I	1	338181	11	4	12	3
I	1	338193	8	4	7	5
I	1	338177	3	5	4	4
I	1	203081	NA	NA	NA	NA
I	1	203082	NA	NA	NA	NA
I	1	203078	NA	NA	NA	NA
I	1	203077	NA	NA	NA	NA
I	1	203085	NA	NA	NA	NA
I	1	203084	NA	NA	NA	NA
I	1	203088	NA	NA	NA	NA
I	1	203086	NA	NA	NA	NA
I	1	203087	NA	NA	NA	NA
I	1	203080	NA	NA	NA	NA
I	1	203079	NA	NA	NA	NA
I	1	203100	NA	NA	NA	NA
I	1	203101	NA	NA	NA	NA
I	1	203089	NA	NA	NA	NA
I	1	203090	NA	NA	NA	NA
I	1	203091	NA	NA	NA	NA
I	1	203092	NA	NA	NA	NA
I	1	203093	NA	NA	NA	NA
I	1	203094	NA	NA	NA	NA
I	1	200169	NA	NA	NA	NA
I	1	206854	NA	NA	NA	NA
I	1	206771	NA	NA	NA	NA
I	1	203650	NA	NA	NA	NA
I	1	206759	NA	NA	NA	NA
I	1	203649	NA	NA	NA	NA
I	1	206730	NA	NA	NA	NA
I	1	206729	NA	NA	NA	NA
I	1	338195	NA	NA	NA	NA
I	2	369092	10	3	11	2
I	2	369018	5	4	7	2
I	2	369019	14	5	11	8
I	2	369021	4	3	5	2
I	2	369011	5	5	7	3
I	2	338192	4	5	7	2
I	2	338176	7	3	6	4
I	2	203064	9	6	12	3
I	2	369032	5	4	7	2
I	2	369029	4	3	5	2
I	2	369094	9	4	9	4
I	2	369017	9	5	12	2
I	2	369010	9	4	11	2
I	2	369016	10	5	14	1
I	2	369014	19	6	18	7
I	2	369013	6	4	8	2
I	2	369012	12	5	17	0
I	2	369007	15	4	17	2
I	2	369091	15	4	19	0
I	2	369093	6	4	6	4
I	2	203067	9	3	7	5
I	2	338143	6	3	6	3
I	2	369003	4	3	4	3
I	2	338127	6	4	5	5
I	2	338126	4	4	4	4
I	2	338128	12	4	14	2
I	2	203065	4	NA	NA	NA
I	2	369008	13	4	14	3
I	2	369009	14	6	15	5
I	2	369095	9	5	5	9
I	2	369040	4	5	6	3
I	2	369041	6	5	6	5
I	2	203038	15	3	16	2
I	2	206745	5	4	9	0
I	2	369038	7	5	9	3
I	2	369039	10	4	11	3
I	2	369089	6	3	8	1
I	2	369060	8	4	6	6
I	2	369061	14	5	15	4
I	2	369044	14	5	17	2
I	2	338142	6	5	6	5
I	2	369043	9	2	9	2
I	2	369028	10	2	9	3
I	2	369027	6	5	6	5
I	2	369042	8	5	10	3
I	2	206791	12	6	12	6
I	2	369088	17	4	17	4
I	2	203037	18	6	15	9
I	2	338191	13	6	11	8
I	2	203040	7	6	11	2
I	2	369015	20	6	14	12
I	2	369047	7	4	10	1
I	2	369030	4	3	5	2
I	2	369031	9	3	9	3
I	2	203061	5	3	4	4
I	2	203062	15	5	17	3
I	2	369004	20	5	23	2
I	2	203057	15	4	14	5
I	2	206862	5	5	5	5
I	2	369063	14	5	17	2
I	2	369062	5	3	4	4
I	2	369056	16	4	15	5
I	2	369057	12	5	13	4
I	2	369074	9	6	3	12
I	2	203030	16	5	21	0
I	2	203031	15	5	16	4
I	2	203059	NA	NA	NA	NA
I	2	369090	NA	NA	NA	NA
I	2	203007	NA	NA	NA	NA
I	2	203010	NA	NA	NA	NA
I	2	203009	NA	NA	NA	NA
I	2	203036	NA	NA	NA	NA
I	2	361083	NA	NA	NA	NA
I	2	203051	NA	NA	NA	NA
I	2	203012	NA	NA	NA	NA
I	2	203011	NA	NA	NA	NA
I	2	203073	NA	NA	NA	NA
I	2	203069	NA	NA	NA	NA
I	2	203071	NA	NA	NA	NA
I	2	203074	NA	NA	NA	NA
I	2	369065	NA	NA	NA	NA
I	2	203054	NA	NA	NA	NA
I	2	369001	NA	NA	NA	NA
I	2	369022	NA	NA	NA	NA
I	2	203029	NA	NA	NA	NA
I	2	369966	NA	NA	NA	NA
I	2	369067	NA	NA	NA	NA
I	2	369035	NA	NA	NA	NA
I	2	203028	NA	NA	NA	NA
I	2	369070	NA	NA	NA	NA
I	2	369036	NA	NA	NA	NA
I	2	203060	NA	NA	NA	NA
I	2	369069	NA	NA	NA	NA
I	2	369048	NA	NA	NA	NA
I	2	203004	NA	NA	NA	NA
I	2	203041	NA	NA	NA	NA
I	2	203025	NA	NA	NA	NA
I	2	369020	NA	NA	NA	NA
I	2	369037	NA	NA	NA	NA
I	2	203058	NA	NA	NA	NA
I	2	203044	NA	NA	NA	NA
I	2	203014	NA	NA	NA	NA
I	2	203005	NA	NA	NA	NA
I	2	203043	NA	NA	NA	NA
I	2	203050	NA	NA	NA	NA
I	2	203027	NA	NA	NA	NA
I	2	206868	NA	NA	NA	NA
I	2	206801	NA	NA	NA	NA
I	2	206802	NA	NA	NA	NA
I	2	206816	NA	NA	NA	NA
I	2	203039	NA	NA	NA	NA
I	2	203056	NA	NA	NA	NA
I	2	369058	NA	NA	NA	NA
I	2	203070	NA	NA	NA	NA
I	2	369059	NA	NA	NA	NA
I	2	203052	NA	NA	NA	NA
I	2	369025	NA	NA	NA	NA
I	2	203076	NA	NA	NA	NA
I	2	203075	NA	NA	NA	NA
I	2	369064	NA	NA	NA	NA
I	2	203053	NA	NA	NA	NA
I	2	203072	NA	NA	NA	NA
I	2	369024	NA	NA	NA	NA
I	2	203042	NA	NA	NA	NA
I	2	203055	NA	NA	NA	NA
I	2	206833	NA	NA	NA	NA
I	2	206836	NA	NA	NA	NA
I	2	206835	NA	NA	NA	NA
I	2	206857	NA	NA	NA	NA
I	2	206896	NA	NA	NA	NA
I	2	206856	NA	NA	NA	NA
I	2	206732	NA	NA	NA	NA
I	2	206734	NA	NA	NA	NA
I	2	206735	NA	NA	NA	NA
I	2	206731	NA	NA	NA	NA
I	2	206733	NA	NA	NA	NA
I	2	203033	NA	NA	NA	NA
I	2	206765	NA	NA	NA	NA
I	2	203655	NA	NA	NA	NA
I	2	203010	NA	NA	NA	NA
I	2	203059	NA	NA	NA	NA
I	2	338124	NA	NA	NA	NA
I	2	338112	NA	NA	NA	NA
I	2	338123	NA	NA	NA	NA
I	2	338122	NA	NA	NA	NA
I	2	338125	NA	NA	NA	NA
I	2	338121	NA	NA	NA	NA
H	1	203698	11	4	8	7
H	1	203693	11	4	7	8
H	1	203662	16	4	20	0
H	1	200104	15	4	19	0
H	1	203700	8	4	11	1
H	1	206877	9	NA	NA	NA
H	1	206741	13	4	16	1
H	1	338174	11	4	12	3
H	1	203691	8	4	12	0
H	1	203687	14	5	18	1
H	1	200102	13	5	18	0
H	1	203688	10	6	16	0
H	1	203661	6	5	8	3
H	1	203660	12	4	16	0
H	1	203692	15	4	19	0
H	1	203021	9	4	9	4
H	1	206889	14	4	14	4
H	1	206739	11	7	12	6
H	1	206848	7	7	9	5
H	1	206778	26	6	23	9
H	1	206822	NA	NA	NA	NA
H	1	206843	NA	NA	NA	NA
H	1	206841	NA	NA	NA	NA
H	1	206839	NA	NA	NA	NA
H	1	206842	NA	NA	NA	NA
H	1	206820	NA	NA	NA	NA
H	1	206718	NA	NA	NA	NA
H	2	206753	8	7	10	5
H	2	206894	6	NA	NA	NA
H	2	369078	4	NA	NA	NA
H	2	206830	13	4	17	0
H	2	206779	10	5	10	5
H	2	203682	5	5	7	3
H	2	203645	6	4	9	1
H	2	203610	3	4	2	5
H	2	203648	16	7	18	5
H	2	200113	8	5	13	0
H	2	203644	25	5	12	18
H	2	203647	10	4	14	0
H	2	200114	17	5	19	3
H	2	203642	17	5	16	6
H	2	203640	6	4	7	3
H	2	203606	5	4	4	5
H	2	203611	4	3	4	3
H	2	203643	5	4	6	3
H	2	203022	15	4	16	3
H	2	206799	8	4	12	0
H	2	203646	NA	NA	NA	NA
H	2	206829	NA	NA	NA	NA
H	2	206826	NA	NA	NA	NA
H	2	206828	NA	NA	NA	NA
H	2	206827	NA	NA	NA	NA
H	2	206847	NA	NA	NA	NA
H	2	206815	NA	NA	NA	NA
H	2	206838	NA	NA	NA	NA
H	2	206875	NA	NA	NA	NA
H	2	206860	NA	NA	NA	NA
H	2	206823	NA	NA	NA	NA
H	2	206837	NA	NA	NA	NA
H	2	206861	NA	NA	NA	NA
H	2	206824	NA	NA	NA	NA
H	2	206832	NA	NA	NA	NA
H	2	206831	NA	NA	NA	NA
H	2	206859	NA	NA	NA	NA
H	2	206809	NA	NA	NA	NA
H	2	206819	NA	NA	NA	NA
H	2	206840	NA	NA	NA	NA
H	2	206846	NA	NA	NA	NA
H	2	206845	NA	NA	NA	NA
H	2	206825	NA	NA	NA	NA
H	2	206844	NA	NA	NA	NA
H	2	203654	NA	NA	NA	NA
H	2	206715	NA	NA	NA	NA
H	2	206719	NA	NA	NA	NA
H	2	206789	NA	NA	NA	NA
H	2	206786	NA	NA	NA	NA
H	2	338110	NA	NA	NA	NA
H	1	200146	11	5	14	2
H	1	200119	11	6	5	12
H	1	200165	7	6	10	3
H	1	200187	10	5	15	0
H	1	200145	6	4	10	0
H	1	206877	9	5	5	9
H	1	206855	6	4	5	5
H	1	369084	9	6	6	9
H	1	206804	10	6	5	11
H	1	206807	12	6	5	13
H	1	203095	7	4	8	3
H	1	206870	12	5	15	2
H	1	206879	11	5	5	11
H	1	206880	11	5	6	10
H	1	206872	12	7	7	12
H	1	206863	7	4	9	2
H	1	206887	11	5	11	5
H	1	206886	12	6	6	12
H	1	206882	7	4	8	3
H	1	338186	9	5	10	4
H	1	206885	8	5	9	4
H	1	206888	12	6	8	10
H	1	206803	11	5	7	9
H	1	206883	11	4	6	9
H	1	206884	5	4	7	2
H	1	206890	13	5	7	11
H	1	206895	7	5	4	8
H	1	206866	12	4	6	10
H	1	200120	6	3	7	2
H	1	200166	11	9	7	13
H	1	200158	12	4	5	11
H	1	200157	14	4	9	9
H	1	206763	13	4	7	10
H	1	200121	11	4	6	9
H	1	200149	10	5	13	2
H	1	200148	11	4	12	3
H	1	206738	8	4	9	3
H	1	200144	4	4	6	2
H	1	206765	15	5	15	5
H	1	200153	21	6	21	6
H	1	200154	6	4	4	6
H	1	206751	20	5	17	8
H	1	200155	11	4	9	6
H	1	200167	11	3	13	1
H	1	200129	18	4	7	15
H	1	338169	20	5	16	9
H	1	200159	13	5	6	12
H	1	200163	10	6	5	11
H	1	200136	16	NA	NA	NA
H	1	200135	14	NA	NA	NA
H	1	200134	13	NA	NA	NA
H	1	200137	12	5	4	13
H	1	200133	20	6	5	21
H	1	200132	15	5	3	17
H	1	206753	18	NA	NA	NA
H	1	206755	9	NA	NA	NA
H	1	200143	8	NA	NA	NA
H	1	200138	15	4	6	13
H	1	203633	NA	NA	NA	NA
H	1	200198	NA	NA	NA	NA
H	1	200175	NA	NA	NA	NA
H	1	206726	NA	NA	NA	NA
H	1	206724	NA	NA	NA	NA
H	1	206720	NA	NA	NA	NA
H	1	206711	NA	NA	NA	NA
H	1	206721	NA	NA	NA	NA
H	1	206716	NA	NA	NA	NA
H	1	206722	NA	NA	NA	NA
H	1	206712	NA	NA	NA	NA
H	1	338156	NA	NA	NA	NA
H	1	338157	NA	NA	NA	NA
H	1	338153	NA	NA	NA	NA
H	1	338152	NA	NA	NA	NA
H	2	206897	21	5	22	4
H	2	206900	25	4	19	10
H	2	206898	7	3	8	2
H	2	206865	20	4	24	0
H	2	206878	28	6	31	3
H	2	206864	15	NA	NA	NA
H	2	206876	11	5	5	11
H	2	206849	25	5	22	8
H	2	206850	18	4	22	0
H	2	206851	20	4	24	0
H	2	206813	6	4	7	3
H	2	206808	6	2	5	3
H	2	200127	12	6	12	6
H	2	200195	9	4	13	0
H	2	200152	11	5	10	6
H	2	200196	17	7	22	2
H	2	200162	9	5	14	0
H	2	200161	23	5	28	0
H	2	200176	7	7	12	2
H	2	200180	19	5	24	0
H	2	200177	21	NA	NA	NA
H	2	206717	17	5	16	6
H	2	206891	10	4	14	0
H	2	206892	8	4	12	0
H	2	206893	3	5	5	3
H	2	206899	9	5	14	0
H	2	206814	17	6	18	5
H	2	206812	18	5	16	7
H	2	206834	6	2	5	3
H	2	206852	6	5	11	0
H	2	206853	19	5	19	5
H	2	206811	10	4	8	6
H	2	200164	8	4	8	4
H	2	200199	NA	NA	NA	NA

## Sheet: low
Treat	Plot	Plant	Harvest leaves 14-15
L	1	200108	8
L	1	200109	1
L	1	200140	4
L	1	203638	5
L	1	200184	0
L	1	206818	5
L	1	203641	3
L	1	200110	7
L	1	200111	0
L	1	200174	2
L	1	206817	1
L	1	200172	1
L	1	206873	2
L	1	203666	4
L	1	203665	1
L	1	203667	0
L	1	203668	0
L	1	203603	1
L	1	203684	2
L	1	338197	4
L	1	203686	1
L	1	203651	0
L	1	203609	3
L	1	203699	3
L	1	203607	3
L	1	203632	3
L	1	203612	4
L	1	200123	1
L	1	200124	0
L	1	200126	0
L	1	200122	3
L	1	206725	0
L	1	206787	3
L	1	206704	0
L	1	203664	2
L	1	203663	4
L	1	206821	NA
L	1	203663	NA
L	2	203613	5
L	2	338170	2
L	2	203614	2
L	2	203608	5
L	2	203616	2
L	2	203634	5
L	2	203618	4
L	2	203619	1
L	2	203622	1
L	2	203670	0
L	2	203676	6
L	2	200194	4
L	2	203627	3
L	2	203677	2
L	2	203659	3
L	2	203658	1
L	2	203626	4
L	2	203628	1
L	2	338167	2
L	2	203602	0
L	2	203601	0
L	2	200173	0
L	2	200190	3
L	2	200191	0
L	2	203657	5
L	2	200185	NA
L	2	203604	NA
L	1	203696	9
L	1	203695	1
L	1	203683	2
L	1	203680	19
L	1	203694	0
L	1	203681	3
L	1	338171	1
L	1	338172	6
L	1	200169	6
L	1	206762	-4
L	1	338168	-4
L	1	200116	-3
L	1	338173	2
L	1	200105	8
L	1	200106	4
L	1	200171	6
L	2	203689	3
L	2	200115	11
L	2	200192	12
			2.8

## Sheet: intermediate
Treat	Plot	Plant	havleav14-15
I	1	203629	6
I	1	206761	4
I	1	200142	11
I	2	206706	10
I	2	203624	13
I	2	203625	5
I	2	203656	2
I	2	203672	0
I	2	206754	1
I	2	203673	5
I	2	203605	0
I	2	206737	0
I	2	206780	11
I	2	200183	-2
I	2	200181	10
I	2	338175	5
I	2	206783	0
I	2	203652	12
I	2	203671	6
I	2	206776	0
I	2	206782	-6
I	2	206752	4
I	2	206757	0
I	2	206756	6
I	2	206774	0
I	2	206772	4
I	2	206768	5
I	2	206769	0
I	2	206794	0
I	2	203697	5
I	2	206796	NA
I	2	203032	NA
I	2	206707	NA
I	2	206709	NA
I	2	203623	NA
I	2	206727	NA
I	2	203653	NA
I	2	206810	NA
I	2	203617	NA
I	2	203621	NA
I	2	203615	NA
I	2	206708	NA
I	2	200197	NA
I	2	200125	NA
I	2	206767	NA
I	2	206766	NA
I	2	206748	NA
I	2	206749	NA
I	2	206750	NA
I	2	206705	NA
I	2	206747	NA
I	2	206746	NA
I	2	338139	NA
I	2	338108	NA
I	1	206788	4
I	1	369072	2
I	1	369099	0
I	1	369085	2
I	1	338190	0
I	1	338182	2
I	1	338179	0
I	1	369097	7
I	1	369068	4
I	1	369071	5
I	1	369076	7
I	1	338178	2
I	1	200130	2
I	1	369050	7
I	1	369049	12
I	1	369055	1
I	1	369053	4
I	1	369052	0
I	1	369081	0
I	1	203018	3
I	1	203017	4
I	1	203019	5
I	1	369079	4
I	1	369054	1
I	1	203016	7
I	1	203015	3
I	1	203013	4
I	1	203048	2
I	1	203049	3
I	1	203047	4
I	1	206723	0
I	1	369080	3
I	1	203024	2
I	1	206790	3
I	1	369073	4
I	1	338180	3
I	1	203034	1
I	1	203035	3
I	1	203045	12
I	1	203096	0
I	1	203099	4
I	1	338181	3
I	1	338193	5
I	1	338177	4
I	1	203081	NA
I	1	203082	NA
I	1	203078	NA
I	1	203077	NA
I	1	203085	NA
I	1	203084	NA
I	1	203088	NA
I	1	203086	NA
I	1	203087	NA
I	1	203080	NA
I	1	203079	NA
I	1	203100	NA
I	1	203101	NA
I	1	203089	NA
I	1	203090	NA
I	1	203091	NA
I	1	203092	NA
I	1	203093	NA
I	1	203094	NA
I	1	200169	NA
I	1	206854	NA
I	1	206771	NA
I	1	203650	NA
I	1	206759	NA
I	1	203649	NA
I	1	206730	NA
I	1	206729	NA
I	1	338195	NA
I	2	369092	2
I	2	369018	2
I	2	369019	8
I	2	369021	2
I	2	369011	3
I	2	338192	2
I	2	338176	4
I	2	203064	3
I	2	369032	2
I	2	369029	2
I	2	369094	4
I	2	369017	2
I	2	369010	2
I	2	369016	1
I	2	369014	7
I	2	369013	2
I	2	369012	0
I	2	369007	2
I	2	369091	0
I	2	369093	4
I	2	203067	5
I	2	338143	3
I	2	369003	3
I	2	338127	5
I	2	338126	4
I	2	338128	2
I	2	203065	NA
I	2	369008	3
I	2	369009	5
I	2	369095	9
I	2	369040	3
I	2	369041	5
I	2	203038	2
I	2	206745	0
I	2	369038	3
I	2	369039	3
I	2	369089	1
I	2	369060	6
I	2	369061	4
I	2	369044	2
I	2	338142	5
I	2	369043	2
I	2	369028	3
I	2	369027	5
I	2	369042	3
I	2	206791	6
I	2	369088	4
I	2	203037	9
I	2	338191	8
I	2	203040	2
I	2	369015	12
I	2	369047	1
I	2	369030	2
I	2	369031	3
I	2	203061	4
I	2	203062	3
I	2	369004	2
I	2	203057	5
I	2	206862	5
I	2	369063	2
I	2	369062	4
I	2	369056	5
I	2	369057	4
I	2	369074	12
I	2	203030	0
I	2	203031	4
I	2	203059	NA
I	2	369090	NA
I	2	203007	NA
I	2	203010	NA
I	2	203009	NA
I	2	203036	NA
I	2	361083	NA
I	2	203051	NA
I	2	203012	NA
I	2	203011	NA
I	2	203073	NA
I	2	203069	NA
I	2	203071	NA
I	2	203074	NA
I	2	369065	NA
I	2	203054	NA
I	2	369001	NA
I	2	369022	NA
I	2	203029	NA
I	2	369966	NA
I	2	369067	NA
I	2	369035	NA
I	2	203028	NA
I	2	369070	NA
I	2	369036	NA
I	2	203060	NA
I	2	369069	NA
I	2	369048	NA
I	2	203004	NA
I	2	203041	NA
I	2	203025	NA
I	2	369020	NA
I	2	369037	NA
I	2	203058	NA
I	2	203044	NA
I	2	203014	NA
I	2	203005	NA
I	2	203043	NA
I	2	203050	NA
I	2	203027	NA
I	2	206868	NA
I	2	206801	NA
I	2	206802	NA
I	2	206816	NA
I	2	203039	NA
I	2	203056	NA
I	2	369058	NA
I	2	203070	NA
I	2	369059	NA
I	2	203052	NA
I	2	369025	NA
I	2	203076	NA
I	2	203075	NA
I	2	369064	NA
I	2	203053	NA
I	2	203072	NA
I	2	369024	NA
I	2	203042	NA
I	2	203055	NA
I	2	206833	NA
I	2	206836	NA
I	2	206835	NA
I	2	206857	NA
I	2	206896	NA
I	2	206856	NA
I	2	206732	NA
I	2	206734	NA
I	2	206735	NA
I	2	206731	NA
I	2	206733	NA
I	2	203033	NA
I	2	206765	NA
I	2	203655	NA
I	2	203010	NA
I	2	203059	NA
I	2	338124	NA
I	2	338112	NA
I	2	338123	NA
I	2	338122	NA
I	2	338125	NA
I	2	338121	NA
			3.61151

## Sheet: high
Treat	Plot	Plant	Size14	Size15	havleav14-15
H	1	203698	1.6	1.7	7
H	1	203693	0.93	1.01	8
H	1	203662	2	2.35	0
H	1	200104	0.79	1	0
H	1	203700	1.41	1.5	1
H	1	206877	1.2	1.33	NA
H	1	206741	0.34	0.45	1
H	1	338174	1.46	1.59	3
H	1	203691	2.2	2.35	0
H	1	203687	1.5	1.5	1
H	1	200102	1.5	1.68	0
H	1	203688	2.1	2.4	0
H	1	203661	1.6	1.75	3
H	1	203660	0.98	1.32	0
H	1	203692	1.9	2.07	0
H	1	203021	1.27	1.5	4
H	1	206889	2	2	4
H	1	206739	1.8	2.3	6
H	1	206848	2	2.31	5
H	1	206778	2.45	2.5	9
H	1	206822	2	2.45	NA
H	1	206843	2	2	NA
H	1	206841	2.5	2.65	NA
H	1	206839	0.4	0.6	NA
H	1	206842	0.4	0.65	NA
H	1	206820	1.4	1.5	NA
H	1	206718	0.41	0.47	NA
H	2	206753	1.8	1.95	5
H	2	206894	1.65	1.73	NA
H	2	369078	1.5	1.5	NA
H	2	206830	1.2	1.47	0
H	2	206779	0.53	1.65	5
H	2	203682	1.21	1.39	3
H	2	203645	1.5	1.7	1
H	2	203610	1.08	1.1	5
H	2	203648	1.8	1.8	5
H	2	200113	1.9	2.02	0
H	2	203644	1.95	2.01	18
H	2	203647	2.2	2.4	0
H	2	200114	0.12	0.17	3
H	2	203642	2.5	2.5	6
H	2	203640	1.7	1.8	3
H	2	203606	0.37	0.46	5
H	2	203611	1.45	1.7	3
H	2	203643	0.13	0.24	3
H	2	203022	1	1.21	3
H	2	206799	1.8	2.1	0
H	2	203646	1.75	2	NA
H	2	206829	1.32	1.5	NA
H	2	206826	1.43	1.5	NA
H	2	206828	0.14	0.17	NA
H	2	206827	0.19	0.22	NA
H	2	206847	0.89	1.1	NA
H	2	206815	1.29	1.4	NA
H	2	206838	1.14	1.2	NA
H	2	206875	1.17	1.32	NA
H	2	206860	2	2.1	NA
H	2	206823	1.5	1.7	NA
H	2	206837	1.5	1.5	NA
H	2	206861	1.9	2.2	NA
H	2	206824	1.02	1.18	NA
H	2	206832	2	2.2	NA
H	2	206831	2.11	2.55	NA
H	2	206859	0.98	1	NA
H	2	206809	0.95	1.16	NA
H	2	206819	0.11	0.32	NA
H	2	206840	0.45	0.77	NA
H	2	206846	1.75	1.83	NA
H	2	206845	1	1.5	NA
H	2	206825	1.5	1.55	NA
H	2	206844	1.21	1.45	NA
H	2	203654	0.89	1.12	NA
H	2	206715	1.35	1.5	NA
H	2	206719	1.5	1.75	NA
H	2	206789	1.5	1.7	NA
H	2	206786	1.2	1.2	NA
H	2	338110	1	1.2	NA
H	1	200146	0.5	1	2
H	1	200119	1.3	1.5	12
H	1	200165	0.25	0.4	3
H	1	200187	1.36	1.75	0
H	1	200145	0.73	1.04	0
H	1	206877	1	1.2	9
H	1	206855	1.5	2	5
H	1	369084	2.34	2.5	9
H	1	206804	3	3.5	11
H	1	206807	2	2	13
H	1	203095	1.4	1.5	3
H	1	206870	0.75	0.79	2
H	1	206879	1.8	2.05	11
H	1	206880	1.02	1.13	10
H	1	206872	1.8	2	12
H	1	206863	2.2	2.5	2
H	1	206887	1.5	2	5
H	1	206886	1.7	1.75	12
H	1	206882	1.8	2	3
H	1	338186	1.85	1.9	4
H	1	206885	1.75	2	4
H	1	206888	2.13	2.5	10
H	1	206803	1.4	1.95	9
H	1	206883	4.75	5.35	9
H	1	206884	4	4.5	2
H	1	206890	1.8	2.1	11
H	1	206895	1.6	1.8	8
H	1	206866	1.9	2	10
H	1	200120	1.5	1.75	2
H	1	200166	1.5	1.6	13
H	1	200158	1.4	1.5	11
H	1	200157	1.5	1.75	9
H	1	206763	1.5	1.7	10
H	1	200121	1.3	1.4	9
H	1	200149	1.9	2	2
H	1	200148	4	4	3
H	1	206738	1.75	2	3
H	1	200144	0.68	NA	2
H	1	206765	0.09	0.12	5
H	1	200153	0.73	0.79	6
H	1	200154	0.46	NA	6
H	1	206751	0.36	NA	8
H	1	200155	0.26	0.79	6
H	1	200167	NA	0.93	1
H	1	200129	NA	0.63	15
H	1	338169	NA	0.46	9
H	1	200159	NA	0.2	12
H	1	200163	NA	0.15	11
H	1	200136	NA	0.15	NA
H	1	200135	NA	0.15	NA
H	1	200134	NA	0.25	NA
H	1	200137	NA	0.24	13
H	1	200133	NA	0.32	21
H	1	200132	NA	0.08	17
H	1	206753	NA	0.16	NA
H	1	206755	NA	0.09	NA
H	1	200143	NA	0.12	NA
H	1	200138	NA	0.21	13
H	1	203633	NA	0.19	NA
H	1	200198	NA	NA	NA
H	1	200175	NA	NA	NA
H	1	206726	0.81	1	NA
H	1	206724	0.65	0.7	NA
H	1	206720	0.74	1.09	NA
H	1	206711	3.5	4	NA
H	1	206721	0.73	1.3	NA
H	1	206716	0.5	0.6	NA
H	1	206722	0.4	0.5	NA
H	1	206712	0.39	0.66	NA
H	1	338156	0.51	0.67	NA
H	1	338157	0.35	0.49	NA
H	1	338153	1.49	1.7	NA
H	1	338152	0.07	0.18	NA
H	2	206897	0.35	0.57	4
H	2	206900	1.75	2	10
H	2	206898	0.32	0.52	2
H	2	206865	0.57	0.88	0
H	2	206878	0.95	1.19	3
H	2	206864	0.34	0.53	NA
H	2	206876	1.07	1.36	11
H	2	206849	0.48	0.52	8
H	2	206850	0.78	0.98	0
H	2	206851	1	1.26	0
H	2	206813	0.3	0.41	3
H	2	206808	1.56	2.12	3
H	2	200127	2	2.45	6
H	2	200195	1.35	1.46	0
H	2	200152	2	2.3	6
H	2	200196	0.31	0.45	2
H	2	200162	0.56	0.7	0
H	2	200161	0.9	1.16	0
H	2	200176	2.3	2.65	2
H	2	200180	0.15	0.2	0
H	2	200177	0.86	1.15	NA
H	2	206717	0.21	0.46	6
H	2	206891	0.7	0.92	0
H	2	206892	0.41	0.62	0
H	2	206893	1.11	1.4	3
H	2	206899	0.95	1.1	0
H	2	206814	4.1	4.25	5
H	2	206812	1.75	2	7
H	2	206834	0.3	0.41	3
H	2	206852	1	1.2	0
H	2	206853	0.5	0.58	5
H	2	206811	0.43	0.56	6
H	2	200164	0.38	0.4	4
H	2	200199	1.15	1.26	NA
					5.14167
